# Supplementary material for: Rapid extirpation of a North American frog coincides with an increase in fungal pathogen prevalence: Historical analysis and implications for reintroduction
Source: PubMed Central journal article supplement (PMC5723621; doi:10.1002/ece3.3468), 2017-10-25
Supplement: ECE3-7-10216-s002.pdf [file ECE3-7-10216-s002.pdf]

Appendix 2. Museum specimen data used for analysis. Reps positive = number of qPCR replicates (out of 3) in which Bd was detected. Species codes are available in Figure 3 of the main text.

| <u>Institution</u> | <u>Catalog #</u> | <u>Species</u> | <u>County</u> | <u>Year Collected</u> | <u>Reps Positive</u> |
|--------------------|------------------|----------------|---------------|-----------------------|----------------------|
| UCSB               | 6721             | RADR           | Santa Barbara | 1975                  | 0                    |
| UCSB               | 8023             | RADR           | Ventura       | 1979                  | 0                    |
| UCSB               | 9427             | HYRE           | Santa Barbara | 1973                  | 1                    |
| UCSB               | 9836             | HYCA           | Santa Barbara | 1979                  | 0                    |
| UCSB               | 9837             | HYCA           | Santa Barbara | 1979                  | 0                    |
| UCSB               | 9838             | HYCA           | Santa Barbara | 1979                  | 0                    |
| UCSB               | 9839             | HYCA           | Santa Barbara | 1979                  | 0                    |
| UCSB               | 9840             | HYCA           | Santa Barbara | 1979                  | 0                    |
| UCSB               | 9841             | HYCA           | Ventura       | 1979                  | 0                    |
| UCSB               | 9842             | HYCA           | Ventura       | 1979                  | 0                    |
| UCSB               | 9843             | HYRE           | Santa Barbara | 1979                  | 0                    |
| UCSB               | 9852             | RADR           | Santa Barbara | 1979                  | 2                    |
| UCSB               | 9853             | RADR           | Santa Barbara | 1979                  | 2                    |
| UCSB               | 9854             | RADR           | Santa Barbara | 1979                  | 1                    |
| UCSB               | 9855             | RADR           | Santa Barbara | 1979                  | 0                    |
| UCSB               | 9966             | HYRE           | Ventura       | 1979                  | 2                    |
| UCSB               | 9967             | HYRE           | Ventura       | 1979                  | 3                    |
| UCSB               | 9968             | HYRE           | Ventura       | 1979                  | 3                    |
| UCSB               | 9969             | HYRE           | Ventura       | 1979                  | 3                    |
| UCSB               | 9970             | HYRE           | Ventura       | 1979                  | 3                    |
| UCSB               | 9972             | HYCA           | Santa Barbara | 1979                  | 0                    |
| UCSB               | 9973             | HYCA           | Santa Barbara | 1979                  | 0                    |
| UCSB               | 9974             | HYCA           | Santa Barbara | 1979                  | 0                    |
| UCSB               | 9975             | HYCA           | Santa Barbara | 1979                  | 0                    |
| UCSB               | 9977             | HYCA           | Santa Barbara | 1979                  | 0                    |
| UCSB               | 9978             | HYCA           | Santa Barbara | 1979                  | 0                    |
| UCSB               | 9979             | HYCA           | Santa Barbara | 1979                  | 0                    |
| UCSB               | 9980             | HYCA           | Santa Barbara | 1979                  | 0                    |
| UCSB               | 9981             | HYCA           | Santa Barbara | 1979                  | 0                    |
| UCSB               | 9982             | HYCA           | Santa Barbara | 1979                  | 0                    |
| UCSB               | 9983             | HYCA           | Santa Barbara | 1979                  | 0                    |
| UCSB               | 9984             | HYCA           | Santa Barbara | 1979                  | 0                    |
| UCSB               | 9985             | HYCA           | Santa Barbara | 1979                  | 0                    |
| UCSB               | 10010            | HYRE           | Santa Barbara | 1979                  | 0                    |
| UCSB               | 10011            | HYCA           | Santa Barbara | 1979                  | 0                    |
| UCSB               | 10012            | HYCA           | Santa Barbara | 1979                  | 0                    |
| UCSB               | 10013            | HYCA           | Santa Barbara | 1979                  | 0                    |
| UCSB               | 10014            | HYCA           | Santa Barbara | 1979                  | 0                    |
| UCSB               | 10015            | HYCA           | Santa Barbara | 1979                  | 0                    |
| UCSB               | 10016            | HYCA           | Santa Barbara | 1979                  | 0                    |
| UCSB               | 10017            | HYCA           | Santa Barbara | 1979                  | 0                    |

Appendix 2. Museum specimen data used for analysis. Reps positive = number of qPCR replicates (out of 3) in which Bd was detected. Species codes are available in Figure 3 of the main text.

| <u>Institution</u> | <u>Catalog #</u> | <u>Species</u> | <u>County</u> | <u>Year Collected</u> | <u>Reps Positive</u> |
|--------------------|------------------|----------------|---------------|-----------------------|----------------------|
| UCSB               | 10018            | HYCA           | Santa Barbara | 1979                  | 0                    |
| UCSB               | 10019            | HYCA           | Santa Barbara | 1979                  | 0                    |
| UCSB               | 10020            | HYCA           | Santa Barbara | 1979                  | 0                    |
| UCSB               | 10021            | HYCA           | Santa Barbara | 1979                  | 0                    |
| UCSB               | 10022            | HYCA           | Santa Barbara | 1979                  | 0                    |
| UCSB               | 10023            | HYCA           | Santa Barbara | 1979                  | 0                    |
| UCSB               | 10024            | HYCA           | Santa Barbara | 1979                  | 0                    |
| UCSB               | 10025            | HYCA           | Santa Barbara | 1979                  | 0                    |
| UCSB               | 10026            | HYCA           | Santa Barbara | 1979                  | 0                    |
| UCSB               | 10027            | HYCA           | Ventura       | 1979                  | 0                    |
| UCSB               | 10028            | HYCA           | Ventura       | 1979                  | 0                    |
| UCSB               | 10029            | HYCA           | Ventura       | 1979                  | 0                    |
| UCSB               | 10030            | HYCA           | Ventura       | 1979                  | 0                    |
| UCSB               | 10031            | HYCA           | Ventura       | 1979                  | 0                    |
| UCSB               | 10032            | HYCA           | Ventura       | 1979                  | 0                    |
| UCSB               | 10033            | HYCA           | Ventura       | 1979                  | 0                    |
| UCSB               | 10034            | HYCA           | Ventura       | 1979                  | 1                    |
| UCSB               | 10035            | HYCA           | Ventura       | 1979                  | 0                    |
| UCSB               | 10036            | HYCA           | Ventura       | 1979                  | 0                    |
| UCSB               | 10037            | HYCA           | Ventura       | 1979                  | 0                    |
| UCSB               | 10038            | HYCA           | Ventura       | 1979                  | 3                    |
| UCSB               | 10039            | HYCA           | Ventura       | 1980                  | 0                    |
| UCSB               | 10040            | HYCA           | Ventura       | 1980                  | 0                    |
| UCSB               | 10041            | HYCA           | Ventura       | 1980                  | 0                    |
| UCSB               | 10042            | HYCA           | Ventura       | 1980                  | 0                    |
| UCSB               | 10043            | HYCA           | Ventura       | 1980                  | 3                    |
| UCSB               | 10044            | HYCA           | Ventura       | 1980                  | 3                    |
| UCSB               | 10045            | HYCA           | Ventura       | 1980                  | 3                    |
| UCSB               | 10046            | HYCA           | Ventura       | 1980                  | 1                    |
| UCSB               | 10047            | HYCA           | Ventura       | 1980                  | 0                    |
| UCSB               | 10048            | HYCA           | Ventura       | 1980                  | 1                    |
| UCSB               | 10061            | HYCA           | Ventura       | 1979                  | 0                    |
| UCSB               | 10062            | HYCA           | Ventura       | 1979                  | 0                    |
| UCSB               | 10063            | HYCA           | Ventura       | 1979                  | 1                    |
| UCSB               | 10064            | HYRE           | Ventura       | 1979                  | 1                    |
| UCSB               | 10065            | HYRE           | Ventura       | 1979                  | 1                    |
| UCSB               | 10066            | HYRE           | Ventura       | 1979                  | 0                    |
| UCSB               | 10079            | HYCA           | Santa Barbara | 1979                  | 1                    |
| UCSB               | 10081            | HYRE           | Santa Barbara | 1980                  | 0                    |
| UCSB               | 10089            | HYCA           | Santa Barbara | 1980                  | 0                    |
| UCSB               | 11301            | RADR           | Santa Barbara | 1980                  | 0                    |

Appendix 2. Museum specimen data used for analysis. Reps positive = number of qPCR replicates (out of 3) in which Bd was detected. Species codes are available in Figure 3 of the main text.

| <u>Institution</u> | <u>Catalog #</u> | <u>Species</u> | <u>County</u> | <u>Year Collected</u> | <u>Reps Positive</u> |
|--------------------|------------------|----------------|---------------|-----------------------|----------------------|
| UCSB               | 11371            | RADR           | Santa Barbara | 1979                  | 0                    |
| UCSB               | 11398            | ANBO           | Santa Barbara | 1980                  | 0                    |
| UCSB               | 11461            | HYRE           | Santa Barbara | 1981                  | 3                    |
| UCSB               | 11516            | HYCA           | Santa Barbara | 1980                  | 0                    |
| UCSB               | 11517            | HYCA           | Santa Barbara | 1980                  | 0                    |
| UCSB               | 11518            | HYCA           | Santa Barbara | 1980                  | 0                    |
| UCSB               | 11519            | HYCA           | Santa Barbara | 1980                  | 0                    |
| UCSB               | 11520            | HYRE           | Santa Barbara | 1979                  | 0                    |
| UCSB               | 11521            | HYRE           | Santa Barbara | 1979                  | 0                    |
| UCSB               | 11522            | HYCA           | Santa Barbara | 1979                  | 0                    |
| UCSB               | 11523            | HYCA           | Santa Barbara | 1979                  | 0                    |
| UCSB               | 11524            | HYCA           | Santa Barbara | 1979                  | 0                    |
| UCSB               | 11525            | HYCA           | Santa Barbara | 1979                  | 0                    |
| UCSB               | 11526            | HYCA           | Ventura       | 1980                  | 0                    |
| UCSB               | 11527            | HYCA           | Ventura       | 1980                  | 0                    |
| UCSB               | 11528            | HYCA           | Ventura       | 1980                  | 1                    |
| UCSB               | 11529            | HYCA           | Ventura       | 1980                  | 0                    |
| UCSB               | 11539            | HYCA           | Ventura       | 1980                  | 0                    |
| UCSB               | 11540            | HYCA           | Ventura       | 1980                  | 0                    |
| UCSB               | 11615            | HYRE           | Los Angeles   | 1980                  | 0                    |
| UCSB               | 11616            | HYRE           | Los Angeles   | 1980                  | 0                    |
| UCSB               | 11617            | HYRE           | Los Angeles   | 1980                  | 0                    |
| UCSB               | 11618            | HYRE           | Los Angeles   | 1980                  | 1                    |
| UCSB               | 11619            | HYRE           | Los Angeles   | 1980                  | 0                    |
| UCSB               | 11620            | HYRE           | Los Angeles   | 1980                  | 0                    |
| UCSB               | 11623            | HYRE           | Los Angeles   | 1980                  | 3                    |
| UCSB               | 11624            | HYRE           | Los Angeles   | 1980                  | 2                    |
| UCSB               | 11625            | HYRE           | Los Angeles   | 1980                  | 3                    |
| UCSB               | 11626            | HYRE           | Los Angeles   | 1980                  | 2                    |
| UCSB               | 11627            | HYRE           | Los Angeles   | 1980                  | 3                    |
| UCSB               | 11628            | HYRE           | Los Angeles   | 1980                  | 3                    |
| UCSB               | 11629            | HYRE           | Los Angeles   | 1980                  | 0                    |
| UCSB               | 11630            | HYRE           | Los Angeles   | 1980                  | 0                    |
| UCSB               | 11631            | HYRE           | Los Angeles   | 1980                  | 0                    |
| UCSB               | 11632            | HYRE           | Los Angeles   | 1980                  | 1                    |
| UCSB               | 11633            | HYRE           | Los Angeles   | 1980                  | 2                    |
| UCSB               | 11634            | HYRE           | Los Angeles   | 1980                  | 2                    |
| UCSB               | 11635            | HYRE           | Los Angeles   | 1980                  | 2                    |
| UCSB               | 11638            | HYCA           | Ventura       | 1981                  | 3                    |
| UCSB               | 11639            | HYCA           | Ventura       | 1981                  | 2                    |
| UCSB               | 11641            | HYCA           | Ventura       | 1981                  | 1                    |

Appendix 2. Museum specimen data used for analysis. Reps positive = number of qPCR replicates (out of 3) in which Bd was detected. Species codes are available in Figure 3 of the main text.

| <u>Institution</u> | <u>Catalog #</u> | <u>Species</u> | <u>County</u> | <u>Year Collected</u> | <u>Reps Positive</u> |
|--------------------|------------------|----------------|---------------|-----------------------|----------------------|
| UCSB               | 11642            | HYCA           | Ventura       | 1981                  | 0                    |
| UCSB               | 11643            | HYCA           | Ventura       | 1981                  | 0                    |
| UCSB               | 11644            | HYCA           | Ventura       | 1981                  | 0                    |
| UCSB               | 11645            | HYCA           | Ventura       | 1981                  | 0                    |
| UCSB               | 11646            | HYCA           | Ventura       | 1981                  | 0                    |
| UCSB               | 11647            | HYCA           | Santa Barbara | 1979                  | 0                    |
| UCSB               | 11648            | HYCA           | Santa Barbara | 1979                  | 0                    |
| UCSB               | 11649            | HYCA           | Santa Barbara | 1979                  | 0                    |
| UCSB               | 11650            | HYCA           | Santa Barbara | 1979                  | 0                    |
| UCSB               | 11651            | HYCA           | Santa Barbara | 1979                  | 0                    |
| UCSB               | 11652            | HYCA           | Santa Barbara | 1979                  | 0                    |
| UCSB               | 11653            | HYCA           | Santa Barbara | 1979                  | 0                    |
| UCSB               | 11654            | HYCA           | Santa Barbara | 1979                  | 0                    |
| UCSB               | 11655            | HYCA           | Santa Barbara | 1979                  | 0                    |
| UCSB               | 11656            | HYCA           | Santa Barbara | 1979                  | 0                    |
| UCSB               | 11657            | HYCA           | Santa Barbara | 1979                  | 0                    |
| UCSB               | 11681            | HYRE           | Ventura       | 1979                  | 0                    |
| UCSB               | 11682            | HYRE           | Ventura       | 1979                  | 0                    |
| UCSB               | 11683            | HYRE           | Ventura       | 1979                  | 0                    |
| UCSB               | 11684            | HYRE           | Ventura       | 1979                  | 0                    |
| UCSB               | 11685            | HYRE           | Ventura       | 1979                  | 0                    |
| UCSB               | 11686            | HYRE           | Ventura       | 1979                  | 1                    |
| UCSB               | 11687            | HYRE           | Ventura       | 1979                  | 1                    |
| UCSB               | 11688            | HYRE           | Ventura       | 1979                  | 0                    |
| UCSB               | 11689            | RACA           | Ventura       | 1979                  | 0                    |
| UCSB               | 11700            | HYRE           | Santa Barbara | 1981                  | 0                    |
| UCSB               | 11701            | HYRE           | Santa Barbara | 1981                  | 3                    |
| UCSB               | 11705            | HYCA           | Ventura       | 1981                  | 1                    |
| UCSB               | 11706            | HYCA           | Ventura       | 1981                  | 2                    |
| UCSB               | 11707            | HYRE           | Santa Barbara | 1981                  | 0                    |
| UCSB               | 11708            | HYRE           | Ventura       | 1981                  | 0                    |
| UCSB               | 11745            | RADR           | Santa Barbara | 1980                  | 2                    |
| UCSB               | 11747            | HYRE           | Santa Barbara | 1980                  | 0                    |
| UCSB               | 11816            | HYRE           | Ventura       | 1979                  | 0                    |
| UCSB               | 11818            | HYRE           | Santa Barbara | 1979                  | 1                    |
| UCSB               | 11819            | HYCA           | Ventura       | 1979                  | 1                    |
| UCSB               | 11820            | HYCA           | Santa Barbara | 1979                  | 0                    |
| UCSB               | 11821            | HYRE           | Ventura       | 1981                  | 0                    |
| UCSB               | 11889            | HYRE           | Santa Barbara | 1980                  | 0                    |
| UCSB               | 11891            | HYCA           | Santa Barbara | 1979                  | 0                    |
| UCSB               | 11892            | HYCA           | Santa Barbara | 1979                  | 1                    |

Appendix 2. Museum specimen data used for analysis. Reps positive = number of qPCR replicates (out of 3) in which Bd was detected. Species codes are available in Figure 3 of the main text.

| <u>Institution</u> | <u>Catalog #</u> | <u>Species</u> | <u>County</u> | <u>Year Collected</u> | <u>Reps Positive</u> |
|--------------------|------------------|----------------|---------------|-----------------------|----------------------|
| UCSB               | 11893            | HYCA           | Santa Barbara | 1979                  | 0                    |
| UCSB               | 11894            | HYCA           | Santa Barbara | 1979                  | 0                    |
| UCSB               | 11895            | HYCA           | Santa Barbara | 1979                  | 0                    |
| UCSB               | 11896            | HYCA           | Santa Barbara | 1979                  | 0                    |
| UCSB               | 11897            | HYCA           | Santa Barbara | 1979                  | 0                    |
| UCSB               | 11898            | HYCA           | Santa Barbara | 1979                  | 0                    |
| UCSB               | 11899            | HYCA           | Santa Barbara | 1979                  | 0                    |
| UCSB               | 11900            | HYCA           | Santa Barbara | 1979                  | 0                    |
| UCSB               | 11901            | HYCA           | Santa Barbara | 1979                  | 0                    |
| UCSB               | 11902            | HYCA           | Santa Barbara | 1979                  | 0                    |
| UCSB               | 11903            | HYCA           | Santa Barbara | 1979                  | 0                    |
| UCSB               | 11904            | HYCA           | Santa Barbara | 1979                  | 0                    |
| UCSB               | 11905            | HYCA           | Santa Barbara | 1979                  | 1                    |
| UCSB               | 11906            | HYCA           | Santa Barbara | 1979                  | 0                    |
| UCSB               | 11907            | HYCA           | Santa Barbara | 1979                  | 0                    |
| UCSB               | 11908            | HYCA           | Santa Barbara | 1979                  | 0                    |
| UCSB               | 11909            | HYCA           | Santa Barbara | 1979                  | 0                    |
| UCSB               | 11910            | HYCA           | Santa Barbara | 1979                  | 0                    |
| UCSB               | 11911            | HYCA           | Santa Barbara | 1979                  | 0                    |
| UCSB               | 11912            | HYCA           | Santa Barbara | 1979                  | 0                    |
| UCSB               | 11913            | HYCA           | Santa Barbara | 1979                  | 0                    |
| UCSB               | 11914            | HYCA           | Santa Barbara | 1979                  | 0                    |
| UCSB               | 11915            | HYRE           | Santa Barbara | 1979                  | 0                    |
| UCSB               | 11923            | HYCA           | Ventura       | 1979                  | 0                    |
| UCSB               | 11924            | HYCA           | Ventura       | 1979                  | 0                    |
| UCSB               | 11925            | HYCA           | Ventura       | 1979                  | 0                    |
| UCSB               | 11926            | HYCA           | Ventura       | 1979                  | 0                    |
| UCSB               | 11927            | HYCA           | Ventura       | 1979                  | 0                    |
| UCSB               | 11928            | HYCA           | Ventura       | 1979                  | 0                    |
| UCSB               | 11929            | HYCA           | Ventura       | 1979                  | 0                    |
| UCSB               | 11930            | HYCA           | Ventura       | 1979                  | 0                    |
| UCSB               | 11932            | HYCA           | Ventura       | 1979                  | 0                    |
| UCSB               | 11933            | HYCA           | Ventura       | 1979                  | 0                    |
| UCSB               | 11934            | HYCA           | Ventura       | 1979                  | 3                    |
| UCSB               | 11937            | HYCA           | Ventura       | 1979                  | 0                    |
| UCSB               | 11939            | HYCA           | Ventura       | 1979                  | 0                    |
| UCSB               | 11940            | HYCA           | Ventura       | 1979                  | 0                    |
| UCSB               | 11941            | HYCA           | Ventura       | 1979                  | 0                    |
| UCSB               | 11943            | HYCA           | Ventura       | 1979                  | 0                    |
| UCSB               | 11944            | HYCA           | Ventura       | 1979                  | 0                    |
| UCSB               | 11946            | HYCA           | Ventura       | 1979                  | 0                    |

Appendix 2. Museum specimen data used for analysis. Reps positive = number of qPCR replicates (out of 3) in which Bd was detected. Species codes are available in Figure 3 of the main text.

| <u>Institution</u> | <u>Catalog #</u> | <u>Species</u> | <u>County</u> | <u>Year Collected</u> | <u>Reps Positive</u> |
|--------------------|------------------|----------------|---------------|-----------------------|----------------------|
| UCSB               | 11947            | HYCA           | Ventura       | 1979                  | 0                    |
| UCSB               | 11950            | HYCA           | Ventura       | 1979                  | 0                    |
| UCSB               | 11951            | HYCA           | Ventura       | 1979                  | 0                    |
| UCSB               | 12278            | RADR           | Santa Barbara | 1981                  | 0                    |
| UCSB               | 12535            | HYRE           | Los Angeles   | 1981                  | 1                    |
| UCSB               | 12536            | HYRE           | Los Angeles   | 1981                  | 1                    |
| UCSB               | 12600            | HYRE           | Ventura       | 1980                  | 0                    |
| UCSB               | 12601            | HYRE           | Ventura       | 1980                  | 0                    |
| UCSB               | 12607            | HYRE           | Ventura       | 1980                  | 0                    |
| UCSB               | 12608            | HYRE           | Ventura       | 1980                  | 0                    |
| UCSB               | 12609            | HYCA           | Ventura       | 1980                  | 0                    |
| UCSB               | 12610            | HYRE           | Ventura       | 1980                  | 0                    |
| UCSB               | 12612            | HYRE           | Ventura       | 1981                  | 3                    |
| UCSB               | 12613            | HYRE           | Ventura       | 1981                  | 0                    |
| UCSB               | 12615            | HYRE           | Ventura       | 1981                  | 3                    |
| UCSB               | 12641            | HYCA           | Santa Barbara | 1979                  | 0                    |
| UCSB               | 12642            | HYCA           | Santa Barbara | 1979                  | 0                    |
| UCSB               | 12647            | HYCA           | Ventura       | 1979                  | 0                    |
| UCSB               | 12648            | HYCA           | Ventura       | 1979                  | 0                    |
| UCSB               | 12666            | HYCA           | Ventura       | 1981                  | 0                    |
| UCSB               | 12667            | HYCA           | Ventura       | 1981                  | 0                    |
| UCSB               | 12668            | HYCA           | Ventura       | 1981                  | 0                    |
| UCSB               | 12669            | HYCA           | Ventura       | 1981                  | 0                    |
| UCSB               | 12670            | HYCA           | Ventura       | 1981                  | 0                    |
| UCSB               | 12671            | HYRE           | Santa Barbara | 1981                  | 0                    |
| UCSB               | 12672            | HYCA           | Ventura       | 1981                  | 1                    |
| UCSB               | 12673            | HYCA           | Ventura       | 1981                  | 0                    |
| UCSB               | 12674            | HYCA           | Ventura       | 1981                  | 0                    |
| UCSB               | 12675            | HYCA           | Santa Barbara | 1980                  | 0                    |
| UCSB               | 12676            | HYCA           | Santa Barbara | 1980                  | 0                    |
| UCSB               | 12677            | HYCA           | Santa Barbara | 1980                  | 0                    |
| UCSB               | 12678            | HYCA           | Santa Barbara | 1980                  | 0                    |
| UCSB               | 12681            | HYCA           | Santa Barbara | 1980                  | 0                    |
| UCSB               | 12682            | HYCA           | Santa Barbara | 1979                  | 0                    |
| UCSB               | 12683            | HYCA           | Ventura       | 1980                  | 0                    |
| UCSB               | 12684            | HYCA           | Ventura       | 1980                  | 0                    |
| UCSB               | 12685            | HYCA           | Ventura       | 1980                  | 1                    |
| UCSB               | 12686            | HYCA           | Ventura       | 1980                  | 0                    |
| UCSB               | 12692            | HYRE           | Santa Barbara | 1980                  | 0                    |
| UCSB               | 12769            | HYRE           | Ventura       | 1981                  | 0                    |
| UCSB               | 12770            | HYRE           | Ventura       | 1981                  | 0                    |

Appendix 2. Museum specimen data used for analysis. Reps positive = number of qPCR replicates (out of 3) in which Bd was detected. Species codes are available in Figure 3 of the main text.

| <u>Institution</u> | <u>Catalog #</u> | <u>Species</u> | <u>County</u> | <u>Year Collected</u> | <u>Reps Positive</u> |
|--------------------|------------------|----------------|---------------|-----------------------|----------------------|
| UCSB               | 12771            | HYRE           | Ventura       | 1981                  | 0                    |
| UCSB               | 12772            | HYRE           | Ventura       | 1981                  | 0                    |
| UCSB               | 13042            | RADR           | Ventura       | 1981                  | 1                    |
| UCSB               | 13578            | HYCA           | Ventura       | 1982                  | 0                    |
| UCSB               | 13579            | HYCA           | Ventura       | 1982                  | 3                    |
| UCSB               | 13580            | HYCA           | Ventura       | 1982                  | 0                    |
| UCSB               | 13581            | HYCA           | Ventura       | 1982                  | 3                    |
| UCSB               | 13582            | HYCA           | Ventura       | 1982                  | 0                    |
| UCSB               | 13583            | HYCA           | Santa Barbara | 1982                  | 1                    |
| UCSB               | 13800            | HYRE           | Santa Barbara | 1979                  | 2                    |
| UCSB               | 13936            | HYRE           | Los Angeles   | 1982                  | 3                    |
| UCSB               | 13937            | HYRE           | Los Angeles   | 1982                  | 3                    |
| UCSB               | 13938            | HYRE           | Los Angeles   | 1982                  | 3                    |
| UCSB               | 14134            | HYRE           | Santa Barbara | 1982                  | 1                    |
| UCSB               | 14137            | HYRE           | Santa Barbara | 1982                  | 0                    |
| UCSB               | 14138            | HYRE           | Los Angeles   | 1982                  | 2                    |
| UCSB               | 14552            | RADR           | Santa Barbara | 1982                  | 2                    |
| UCSB               | 14573            | HYCA           | Ventura       | 1981                  | 0                    |
| UCSB               | 14574            | HYCA           | Ventura       | 1981                  | 0                    |
| UCSB               | 14575            | HYCA           | Ventura       | 1981                  | 0                    |
| UCSB               | 14576            | HYCA           | Ventura       | 1981                  | 0                    |
| UCSB               | 14577            | HYCA           | Santa Barbara | 1982                  | 0                    |
| UCSB               | 14578            | HYCA           | Santa Barbara | 1982                  | 0                    |
| UCSB               | 14586            | HYRE           | Santa Barbara | 1982                  | 0                    |
| UCSB               | 14824            | HYRE           | Santa Barbara | 1982                  | 0                    |
| UCSB               | 14884            | RADR           | Santa Barbara | 1982                  | 1                    |
| UCSB               | 15019            | HYRE           | Ventura       | 1983                  | 2                    |
| UCSB               | 15020            | HYRE           | Ventura       | 1983                  | 0                    |
| UCSB               | 15021            | HYRE           | Ventura       | 1983                  | 2                    |
| UCSB               | 15022            | HYRE           | Ventura       | 1983                  | 0                    |
| UCSB               | 15285            | RACA           | Ventura       | 1983                  | 0                    |
| UCSB               | 15286            | RACA           | Ventura       | 1983                  | 0                    |
| UCSB               | 15287            | RACA           | Ventura       | 1983                  | 3                    |
| UCSB               | 15288            | RACA           | Ventura       | 1983                  | 0                    |
| UCSB               | 15289            | RACA           | Ventura       | 1983                  | 3                    |
| UCSB               | 15290            | RACA           | Ventura       | 1983                  | 0                    |
| UCSB               | 15291            | RACA           | Ventura       | 1983                  | 0                    |
| UCSB               | 15292            | RACA           | Ventura       | 1983                  | 1                    |
| UCSB               | 15294            | RACA           | Ventura       | 1983                  | 1                    |
| UCSB               | 15891            | HYCA           | Santa Barbara | 1984                  | 0                    |
| UCSB               | 15892            | HYCA           | Santa Barbara | 1984                  | 0                    |

Appendix 2. Museum specimen data used for analysis. Reps positive = number of qPCR replicates (out of 3) in which Bd was detected. Species codes are available in Figure 3 of the main text.

| <u>Institution</u> | <u>Catalog #</u> | <u>Species</u> | <u>County</u> | <u>Year Collected</u> | <u>Reps Positive</u> |
|--------------------|------------------|----------------|---------------|-----------------------|----------------------|
| UCSB               | 15893            | HYCA           | Santa Barbara | 1984                  | 0                    |
| UCSB               | 15894            | HYCA           | Santa Barbara | 1984                  | 0                    |
| UCSB               | 15895            | HYCA           | Santa Barbara | 1984                  | 1                    |
| UCSB               | 16891            | RADR           | Santa Barbara | 1984                  | 0                    |
| UCSB               | 16892            | RADR           | Santa Barbara | 1984                  | 2                    |
| UCSB               | 17132            | RADR           | Santa Barbara | 1984                  | 0                    |
| UCSB               | 17170            | HYCA           | Ventura       | 1984                  | 0                    |
| UCSB               | 17171            | HYCA           | Ventura       | 1984                  | 0                    |
| UCSB               | 17172            | HYCA           | Ventura       | 1984                  | 0                    |
| UCSB               | 17173            | HYCA           | Ventura       | 1984                  | 0                    |
| UCSB               | 17174            | HYCA           | Ventura       | 1984                  | 0                    |
| UCSB               | 17175            | HYCA           | Santa Barbara | 1984                  | 0                    |
| UCSB               | 17608            | HYCA           | Ventura       | 1981                  | 0                    |
| UCSB               | 17632            | HYCA           | Ventura       | 1984                  | 0                    |
| UCSB               | 17836            | HYRE           | Los Angeles   | 1985                  | 0                    |
| UCSB               | 19547            | HYCA           | Ventura       | 1982                  | 0                    |
| UCSB               | 22305            | HYCA           | Ventura       | 1988                  | 2                    |
| UCSB               | 22306            | HYCA           | Ventura       | 1988                  | 3                    |
| UCSB               | 23667            | HYCA           | Ventura       | 1989                  | 3                    |
| UCSB               | 23668            | HYCA           | Ventura       | 1989                  | 0                    |
| UCSB               | 24674            | HYCA           | Ventura       | 1988                  | 0                    |
| UCSB               | 24948            | RACA           | Ventura       | 1990                  | 0                    |
| UCSB               | 24949            | RACA           | Ventura       | 1990                  | 0                    |
| UCSB               | 24950            | RACA           | Ventura       | 1990                  | 0                    |
| UCSB               | 25120            | RADR           | Santa Barbara | 1990                  | 3                    |
| UCSB               | 25148            | RACA           | Ventura       | 1990                  | 0                    |
| UCSB               | 26543            | HYRE           | Ventura       | 1991                  | 1                    |
| UCSB               | 26544            | HYRE           | Ventura       | 1991                  | 0                    |
| UCSB               | 27716            | RADR           | Santa Barbara | 1993                  | 3                    |
| UCSB               | 27843            | RADR           | Santa Barbara | 1993                  | 3                    |
| UCSB               | 28310            | RADR           | Santa Barbara | 1995                  | 3                    |
| UCSB               | 28422            | RADR           | Santa Barbara | 1995                  | 3                    |
| UCSB               | 28450            | RADR           | Santa Barbara | 1995                  | 3                    |
| UCSB               | 28985            | RADR           | Santa Barbara | 1995                  | 3                    |
| UCSB               | 28995            | RADR           | Santa Barbara | 1995                  | 3                    |
| UCSB               | 28996            | RADR           | Santa Barbara | 1995                  | 3                    |
| UCSB               | 28997            | RADR           | Santa Barbara | 1995                  | 3                    |
| UCSB               | 28998            | RADR           | Santa Barbara | 1995                  | 2                    |
| UCSB               | 28999            | RADR           | Santa Barbara | 1995                  | 0                    |
| UCSB               | 29284            | RADR           | Santa Barbara | 1995                  | 0                    |
| UCSB               | 29288            | RADR           | Santa Barbara | 1995                  | 3                    |



Appendix 2. Museum specimen data used for analysis. Reps positive = number of qPCR replicates (out of 3) in which Bd was detected. Species codes are available in Figure 3 of the main text.

| <u>Institution</u> | <u>Catalog #</u> | <u>Species</u> | <u>County</u>   | <u>Year Collected</u> | <u>Reps Positive</u> |
|--------------------|------------------|----------------|-----------------|-----------------------|----------------------|
| UCSB               | 29290            | RADR           | Santa Barbara   | 1995                  | 3                    |
| UCSB               | 29291            | RADR           | Santa Barbara   | 1995                  | 2                    |
| UCSB               | 29309            | RACA           | Santa Barbara   | 1996                  | 0                    |
| UCSB               | 29310            | RACA           | Santa Barbara   | 1996                  | 0                    |
| UCSB               | 29312            | RACA           | Santa Barbara   | 1996                  | 0                    |
| UCSB               | 29314            | RACA           | Santa Barbara   | 1996                  | 0                    |
| UCSB               | 29315            | RACA           | Santa Barbara   | 1996                  | 0                    |
| UCSB               | 29316            | RACA           | Santa Barbara   | 1996                  | 3                    |
| UCSB               | 29317            | RACA           | Santa Barbara   | 1996                  | 0                    |
| UCSB               | 29318            | RACA           | Santa Barbara   | 1996                  | 2                    |
| UCSB               | 29319            | RACA           | Santa Barbara   | 1996                  | 0                    |
| UCSB               | 29320            | RACA           | Santa Barbara   | 1996                  | 0                    |
| UCSB               | 29321            | RACA           | Santa Barbara   | 1996                  | 3                    |
| UCSB               | 29322            | RACA           | Santa Barbara   | 1996                  | 1                    |
| UCSB               | 29324            | RACA           | Santa Barbara   | 1996                  | 0                    |
| UCSB               | 29328            | RACA           | Santa Barbara   | 1996                  | 2                    |
| UCSB               | 29331            | RACA           | Santa Barbara   | 1996                  | 1                    |
| UCSB               | 29332            | RACA           | Santa Barbara   | 1996                  | 0                    |
| UCSB               | 29342            | RACA           | Santa Barbara   | 1996                  | 0                    |
| UCSB               | 29343            | RACA           | Santa Barbara   | 1996                  | 1                    |
| UCSB               | 29344            | RACA           | Santa Barbara   | 1996                  | 0                    |
| UCSB               | 29361            | RADR           | Santa Barbara   | 1990                  | 0                    |
| UCSB               | 29380            | HYCA           | Ventura         | 1990                  | 0                    |
| UCSB               | 29436            | RADR           | Santa Barbara   | 1995                  | 3                    |
| UCSB               | 29827            | RADR           | San Luis Obispo | 1995                  | 0                    |
| UCSB               | 29828            | RADR           | San Luis Obispo | 1995                  | 0                    |
| UCSB               | 29829            | RADR           | San Luis Obispo | 1995                  | 1                    |
| UCSB               | 29831            | RADR           | San Luis Obispo | 1995                  | 0                    |
| UCSB               | 29832            | RADR           | San Luis Obispo | 1995                  | 0                    |
| UCSB               | 29833            | RADR           | San Luis Obispo | 1995                  | 1                    |
| UCSB               | 30136            | RACA           | Santa Barbara   | 2004                  | 3                    |
| UCSB               | 30525            | RADR           | San Luis Obispo | 1995                  | 1                    |
| UCSB               | 30637            | RADR           | Santa Barbara   | 2009                  | 0                    |
| UCSB               | 31101            | RADR           | Santa Barbara   | 1995                  | 3                    |
| SDNHM              | 2316             | TATO           | Los Angeles     | 1930                  | 0                    |
| SDNHM              | 13295            | TATO           | Los Angeles     | 1930                  | 0                    |
| SDNHM              | 13296            | TATO           | Los Angeles     | 1930                  | 0                    |
| SDNHM              | 14276            | TATO           | Los Angeles     | 1930                  | 0                    |
| SDNHM              | 14277            | TATO           | Los Angeles     | 1930                  | 0                    |
| SDNHM              | 14282            | TATO           | Los Angeles     | 1930                  | 0                    |
| SDNHM              | 14283            | TATO           | Los Angeles     | 1930                  | 0                    |

Appendix 2. Museum specimen data used for analysis. Reps positive = number of qPCR replicates (out of 3) in which Bd was detected. Species codes are available in Figure 3 of the main text.

| <u>Institution</u> | <u>Catalog #</u> | <u>Species</u> | <u>County</u> | <u>Year Collected</u> | <u>Reps Positive</u> |
|--------------------|------------------|----------------|---------------|-----------------------|----------------------|
| SDNHM              | 14286            | TATO           | Los Angeles   | 1930                  | 0                    |
| SDNHM              | 14288            | TATO           | Los Angeles   | 1930                  | 0                    |
| SDNHM              | 14292            | TATO           | Los Angeles   | 1930                  | 0                    |
| SDNHM              | 14294            | TATO           | Los Angeles   | 1930                  | 0                    |
| SDNHM              | 14296            | TATO           | Los Angeles   | 1930                  | 0                    |
| SDNHM              | 14297            | TATO           | Los Angeles   | 1930                  | 0                    |
| SDNHM              | 19525            | TATO           | Los Angeles   | 1958                  | 0                    |
| SDNHM              | 19526            | TATO           | Los Angeles   | 1958                  | 0                    |
| SDNHM              | 19527            | TATO           | Los Angeles   | 1958                  | 0                    |
| SDNHM              | 19528            | TATO           | Los Angeles   | 1958                  | 0                    |
| SDNHM              | 19529            | TATO           | Los Angeles   | 1958                  | 0                    |
| SDNHM              | 19530            | TATO           | Los Angeles   | 1958                  | 0                    |
| SDNHM              | 19532            | TATO           | Los Angeles   | 1958                  | 0                    |
| SDNHM              | 41736            | TATO           | Los Angeles   | 1948                  | 0                    |
| SDNHM              | 41740            | TATO           | Los Angeles   | 1948                  | 0                    |
| SDNHM              | 41742            | TATO           | Los Angeles   | 1948                  | 0                    |
| SDNHM              | 41743            | TATO           | Los Angeles   | 1948                  | 0                    |
| SDNHM              | 41744            | TATO           | Los Angeles   | 1948                  | 0                    |
| SDNHM              | 41745            | TATO           | Los Angeles   | 1948                  | 0                    |
| SDNHM              | 41746            | TATO           | Los Angeles   | 1948                  | 0                    |
| SDNHM              | 41747            | TATO           | Los Angeles   | 1948                  | 0                    |
| SDNHM              | 41748            | TATO           | Los Angeles   | 1948                  | 0                    |
| SDNHM              | 13272            | ANBO           | Los Angeles   | 1930                  | 0                    |
| SDNHM              | 13275            | ANBO           | Los Angeles   | 1930                  | 0                    |
| SDNHM              | 13276            | ANBO           | Los Angeles   | 1930                  | 0                    |
| SDNHM              | 13277            | HYRE           | Los Angeles   | 1930                  | 0                    |
| SDNHM              | 13278            | HYRE           | Los Angeles   | 1930                  | 0                    |
| SDNHM              | 13280            | HYRE           | Los Angeles   | 1930                  | 0                    |
| SDNHM              | 13282            | HYRE           | Los Angeles   | 1930                  | 0                    |
| SDNHM              | 13285            | HYRE           | Los Angeles   | 1930                  | 0                    |
| SDNHM              | 13286            | HYRE           | Los Angeles   | 1930                  | 0                    |
| SDNHM              | 41749            | TATO           | Los Angeles   | 1948                  | 0                    |
| SDNHM              | 47766            | TATO           | Los Angeles   | 1962                  | 0                    |
| SDNHM              | 47767            | TATO           | Los Angeles   | 1962                  | 0                    |
| SDNHM              | 47768            | TATO           | Los Angeles   | 1962                  | 3                    |
| SDNHM              | 19252            | HYCA           | Los Angeles   | 1958                  | 0                    |
| SDNHM              | 19253            | HYCA           | Los Angeles   | 1958                  | 0                    |
| SDNHM              | 19255            | HYCA           | Los Angeles   | 1958                  | 0                    |
| SDNHM              | 19256            | HYCA           | Los Angeles   | 1958                  | 0                    |
| SDNHM              | 19259            | HYCA           | Los Angeles   | 1958                  | 0                    |
| SDNHM              | 19261            | HYCA           | Los Angeles   | 1958                  | 0                    |

Appendix 2. Museum specimen data used for analysis. Reps positive = number of qPCR replicates (out of 3) in which Bd was detected. Species codes are available in Figure 3 of the main text.

| <b><u>Institution</u></b> | <b><u>Catalog #</u></b> | <b><u>Species</u></b> | <b><u>County</u></b> | <b><u>Year Collected</u></b> | <b><u>Reps Positive</u></b> |
|---------------------------|-------------------------|-----------------------|----------------------|------------------------------|-----------------------------|
| SDNHM                     | 19262                   | HYCA                  | Los Angeles          | 1958                         | 0                           |
| SDNHM                     | 19263                   | HYCA                  | Los Angeles          | 1958                         | 0                           |
| SDNHM                     | 19534                   | RADR                  | Los Angeles          | 1958                         | 0                           |
| SDNHM                     | 19535                   | RADR                  | Los Angeles          | 1958                         | 0                           |
| SDNHM                     | 19536                   | RADR                  | Los Angeles          | 1958                         | 0                           |
| SDNHM                     | 19537                   | RADR                  | Los Angeles          | 1958                         | 0                           |
| SDNHM                     | 19538                   | RADR                  | Los Angeles          | 1958                         | 0                           |
| SDNHM                     | 19540                   | RADR                  | Los Angeles          | 1958                         | 0                           |
| SDNHM                     | 19541                   | RADR                  | Los Angeles          | 1958                         | 0                           |
| SDNHM                     | 19542                   | RADR                  | Los Angeles          | 1958                         | 0                           |
| SDNHM                     | 19543                   | RADR                  | Los Angeles          | 1958                         | 0                           |
| SDNHM                     | 19544                   | RADR                  | Los Angeles          | 1958                         | 0                           |
| SDNHM                     | 19545                   | RADR                  | Los Angeles          | 1958                         | 0                           |
| SDNHM                     | 20774                   | RADR                  | Santa Barbara        | 1933                         | 0                           |
| SDNHM                     | 20775                   | RADR                  | Santa Barbara        | 1933                         | 0                           |
| SDNHM                     | 20777                   | HYRE                  | Santa Barbara        | 1933                         | 1                           |
| SDNHM                     | 20778                   | HYRE                  | Santa Barbara        | 1933                         | 0                           |
| SDNHM                     | 33459                   | RADR                  | Santa Barbara        | 1940                         | 0                           |
| SDNHM                     | 33460                   | ANBO                  | Santa Barbara        | 1940                         | 0                           |
| SDNHM                     | 33780                   | HYCA                  | Santa Barbara        | 1941                         | 0                           |
| SDNHM                     | 58376                   | TATO                  | San Luis Obispo      | 1974                         | 0                           |
| SDNHM                     | 59421                   | TATO                  | San Luis Obispo      | 1977                         | 0                           |
| SDNHM                     | 47510                   | HYRE                  | Santa Barbara        | 1968                         | 0                           |
| SDNHM                     | 47511                   | HYRE                  | Santa Barbara        | 1968                         | 0                           |
| SDNHM                     | 53677                   | HYRE                  | San Luis Obispo      | 1962                         | 0                           |
| SDNHM                     | 54344                   | HYRE                  | Los Angeles          | 1962                         | 0                           |
| SDNHM                     | 54345                   | HYRE                  | Los Angeles          | 1962                         | 0                           |
| SDNHM                     | 54346                   | HYRE                  | Los Angeles          | 1962                         | 0                           |
| SDNHM                     | 54347                   | HYRE                  | Los Angeles          | 1962                         | 0                           |
| SDNHM                     | 54348                   | HYRE                  | Los Angeles          | 1962                         | 0                           |
| SDNHM                     | 54349                   | HYRE                  | Los Angeles          | 1962                         | 0                           |
| SDNHM                     | 54350                   | HYRE                  | Los Angeles          | 1962                         | 0                           |
| SDNHM                     | 54351                   | HYRE                  | Los Angeles          | 1962                         | 0                           |
| SDNHM                     | 54352                   | HYRE                  | Los Angeles          | 1962                         | 0                           |
| SDNHM                     | 54353                   | HYRE                  | Los Angeles          | 1962                         | 0                           |
| SDNHM                     | 54354                   | HYRE                  | Los Angeles          | 1962                         | 1                           |
| SDNHM                     | 54355                   | HYRE                  | Los Angeles          | 1962                         | 0                           |
| SDNHM                     | 54356                   | HYRE                  | Los Angeles          | 1962                         | 0                           |
| SDNHM                     | 54357                   | HYRE                  | Los Angeles          | 1962                         | 0                           |
| SDNHM                     | 54358                   | HYRE                  | Los Angeles          | 1962                         | 0                           |
| SDNHM                     | 54359                   | HYRE                  | Los Angeles          | 1962                         | 0                           |

Appendix 2. Museum specimen data used for analysis. Reps positive = number of qPCR replicates (out of 3) in which Bd was detected. Species codes are available in Figure 3 of the main text.

| <b><u>Institution</u></b> | <b><u>Catalog #</u></b> | <b><u>Species</u></b> | <b><u>County</u></b> | <b><u>Year Collected</u></b> | <b><u>Reps Positive</u></b> |
|---------------------------|-------------------------|-----------------------|----------------------|------------------------------|-----------------------------|
| SDNHM                     | 54360                   | HYRE                  | Los Angeles          | 1962                         | 0                           |
| SDNHM                     | 54361                   | HYRE                  | Los Angeles          | 1962                         | 0                           |
| SDNHM                     | 54362                   | HYRE                  | Los Angeles          | 1962                         | 0                           |
| SDNHM                     | 54363                   | HYRE                  | Los Angeles          | 1962                         | 0                           |
| SDNHM                     | 54364                   | HYRE                  | Los Angeles          | 1962                         | 0                           |
| SDNHM                     | 54365                   | HYRE                  | Los Angeles          | 1962                         | 0                           |
| SDNHM                     | 54366                   | HYRE                  | Los Angeles          | 1962                         | 0                           |
| SDNHM                     | 54368                   | HYRE                  | Los Angeles          | 1962                         | 0                           |
| SDNHM                     | 54370                   | HYRE                  | Los Angeles          | 1962                         | 0                           |
| SDNHM                     | 54371                   | HYRE                  | Los Angeles          | 1962                         | 0                           |
| SDNHM                     | 55350                   | HYCA                  | Los Angeles          | 1974                         | 0                           |
| SDNHM                     | 56697                   | ANBO                  | Los Angeles          | 1975                         | 0                           |
| SDNHM                     | 56700                   | ANBO                  | Los Angeles          | 1975                         | 0                           |
| SDNHM                     | 56704                   | ANBO                  | Los Angeles          | 1975                         | 0                           |
| SDNHM                     | 56705                   | ANBO                  | Los Angeles          | 1975                         | 0                           |
| SDNHM                     | 56706                   | ANBO                  | Los Angeles          | 1975                         | 0                           |
| SDNHM                     | 56707                   | ANBO                  | Los Angeles          | 1975                         | 0                           |
| SDNHM                     | 56708                   | ANBO                  | Los Angeles          | 1975                         | 0                           |
| SDNHM                     | 56709                   | ANBO                  | Los Angeles          | 1975                         | 0                           |
| SDNHM                     | 56710                   | ANBO                  | Los Angeles          | 1975                         | 0                           |
| SDNHM                     | 56711                   | ANBO                  | Los Angeles          | 1975                         | 0                           |
| SDNHM                     | 57026                   | HYRE                  | Los Angeles          | 1971                         | 0                           |
| SDNHM                     | 57027                   | HYRE                  | Los Angeles          | 1971                         | 0                           |
| SDNHM                     | 58269                   | HYRE                  | Santa Barbara        | 1975                         | 3                           |
| SDNHM                     | 58273                   | HYRE                  | Santa Barbara        | 1975                         | 3                           |
| SDNHM                     | 58274                   | HYRE                  | Santa Barbara        | 1975                         | 1                           |
| SDNHM                     | 58276                   | HYRE                  | Santa Barbara        | 1975                         | 3                           |
| SDNHM                     | 58277                   | HYRE                  | Santa Barbara        | 1975                         | 2                           |
| SDNHM                     | 58278                   | HYRE                  | Santa Barbara        | 1975                         | 0                           |
| SDNHM                     | 58279                   | RADR                  | Santa Barbara        | 1974                         | 3                           |
| SDNHM                     | 58283                   | ANBO                  | Santa Barbara        | 1974                         | 0                           |
| SDNHM                     | 58284                   | ANBO                  | Santa Barbara        | 1975                         | 0                           |
| SDNHM                     | 58285                   | ANBO                  | Santa Barbara        | 1975                         | 0                           |
| SDNHM                     | 58375                   | RADR                  | Santa Barbara        | 1974                         | 0                           |
| SDNHM                     | 75752                   | HYCA                  | Los Angeles          | 2009                         | 0                           |
| SDNHM                     | 75753                   | HYCA                  | Los Angeles          | 2009                         | 0                           |
| SDNHM                     | 75754                   | HYCA                  | Los Angeles          | 2009                         | 2                           |
| SDNHM                     | 34357                   | TATO                  | Santa Barbara        | 1941                         | 0                           |
| SDNHM                     | 34358                   | TATO                  | Santa Barbara        | 1941                         | 1                           |
| SDNHM                     | 34359                   | TATO                  | Santa Barbara        | 1941                         | 0                           |
| SDNHM                     | 20776                   | RABO                  | Santa Barbara        | 1933                         | 0                           |

Appendix 2. Museum specimen data used for analysis. Reps positive = number of qPCR replicates (out of 3) in which Bd was detected. Species codes are available in Figure 3 of the main text.

| <b><u>Institution</u></b> | <b><u>Catalog #</u></b> | <b><u>Species</u></b> | <b><u>County</u></b> | <b><u>Year Collected</u></b> | <b><u>Reps Positive</u></b> |
|---------------------------|-------------------------|-----------------------|----------------------|------------------------------|-----------------------------|
| SBMNH                     | 85                      | HYRE                  | Santa Barbara        | 1963                         | 0                           |
| SBMNH                     | 86                      | HYRE                  | Santa Barbara        | 1963                         | 0                           |
| SBMNH                     | 87                      | HYRE                  | Santa Barbara        | 1963                         | 0                           |
| SBMNH                     | 88                      | HYCA                  | Santa Barbara        | 1963                         | 0                           |
| SBMNH                     | 89                      | HYRE                  | Santa Barbara        | 1963                         | 0                           |
| SBMNH                     | 90                      | HYRE                  | Santa Barbara        | 1963                         | 0                           |
| SBMNH                     | 91                      | HYRE                  | Santa Barbara        | 1963                         | 0                           |
| SBMNH                     | 92                      | HYRE                  | Santa Barbara        | 1963                         | 0                           |
| SBMNH                     | 93                      | HYRE                  | Santa Barbara        | 1963                         | 0                           |
| SBMNH                     | 94                      | HYRE                  | Santa Barbara        | 1963                         | 0                           |
| SBMNH                     | 95                      | HYRE                  | Santa Barbara        | 1963                         | 0                           |
| SBMNH                     | 96                      | HYRE                  | Santa Barbara        | 1963                         | 0                           |
| SBMNH                     | 98                      | HYCA                  | Santa Barbara        | 1963                         | 0                           |
| SBMNH                     | 99                      | HYRE                  | Santa Barbara        | 1963                         | 0                           |
| SBMNH                     | 106                     | RADR                  | Santa Barbara        | 1963                         | 0                           |
| SBMNH                     | 107                     | RADR                  | Santa Barbara        | 1963                         | 0                           |
| SBMNH                     | 108                     | RADR                  | Santa Barbara        | 1963                         | 0                           |
| SBMNH                     | 109                     | RADR                  | Santa Barbara        | 1963                         | 0                           |
| SBMNH                     | 110                     | RADR                  | Santa Barbara        | 1963                         | 0                           |
| SBMNH                     | 111                     | RADR                  | Santa Barbara        | 1963                         | 0                           |
| SBMNH                     | 112                     | HYCA                  | Santa Barbara        | 1963                         | 0                           |
| SBMNH                     | 113                     | HYCA                  | Santa Barbara        | 1963                         | 0                           |
| SBMNH                     | 114                     | HYRE                  | Santa Barbara        | 1963                         | 0                           |
| SBMNH                     | 115                     | HYCA                  | Santa Barbara        | 1963                         | 0                           |
| SBMNH                     | 116                     | HYCA                  | Santa Barbara        | 1963                         | 0                           |
| SBMNH                     | 117                     | HYCA                  | Santa Barbara        | 1963                         | 0                           |
| SBMNH                     | 118                     | HYCA                  | Santa Barbara        | 1963                         | 0                           |
| SBMNH                     | 119                     | HYCA                  | Santa Barbara        | 1963                         | 0                           |
| SBMNH                     | 120                     | HYCA                  | Santa Barbara        | 1963                         | 0                           |
| SBMNH                     | 121                     | HYCA                  | Santa Barbara        | 1963                         | 0                           |
| SBMNH                     | 122                     | HYCA                  | Santa Barbara        | 1963                         | 0                           |
| SBMNH                     | 264                     | TATO                  | Los Angeles          | 1953                         | 0                           |
| SBMNH                     | 142                     | RADR                  | San Luis Obispo      | 1963                         | 0                           |
| SBMNH                     | 187                     | HYRE                  | Santa Barbara        | 1982                         | 0                           |
| SBMNH                     | 265                     | TATO                  | Los Angeles          | 1953                         | 0                           |
| SBMNH                     | 221                     | ANBO                  | Santa Barbara        | 1974                         | 0                           |
| SBMNH                     | 222                     | HYRE                  | Santa Barbara        | 1974                         | 3                           |
| SBMNH                     | 226                     | RADR                  | Santa Barbara        | 1974                         | 3                           |
| SBMNH                     | 280                     | HYRE                  | Santa Barbara        | 1974                         | 3                           |
| SBMNH                     | 281                     | HYCA                  | Santa Barbara        | 1974                         | 3                           |
| SBMNH                     | 284                     | RADR                  | San Luis Obispo      | 1963                         | 1                           |

Appendix 2. Museum specimen data used for analysis. Reps positive = number of qPCR replicates (out of 3) in which Bd was detected. Species codes are available in Figure 3 of the main text.

| <b><u>Institution</u></b> | <b><u>Catalog #</u></b> | <b><u>Species</u></b> | <b><u>County</u></b> | <b><u>Year Collected</u></b> | <b><u>Reps Positive</u></b> |
|---------------------------|-------------------------|-----------------------|----------------------|------------------------------|-----------------------------|
| SBMNH                     | 316                     | RADR                  | Santa Barbara        | 1975                         | 1                           |
| SBMNH                     | 317                     | RADR                  | Santa Barbara        | 1975                         | 0                           |
| SBMNH                     | 390                     | ANBO                  | Santa Barbara        | 1975                         | 0                           |
| SBMNH                     | 444                     | HYCA                  | Santa Barbara        | 1978                         | 0                           |
| SBMNH                     | 478                     | HYCA                  | Santa Barbara        | 1978                         | 0                           |
| SBMNH                     | 479                     | HYRE                  | Santa Barbara        | 1978                         | 0                           |
| SBMNH                     | 491                     | HYRE                  | Santa Barbara        | 1979                         | 0                           |
| SBMNH                     | 506                     | HYRE                  | Santa Barbara        | 1979                         | 0                           |
| SBMNH                     | 507                     | HYCA                  | Santa Barbara        | 1979                         | 0                           |
| SBMNH                     | 508                     | HYCA                  | Santa Barbara        | 1979                         | 0                           |
| SBMNH                     | 599                     | HYCA                  | Santa Barbara        | 1981                         | 0                           |
| SBMNH                     | 728                     | RACA                  | Santa Barbara        | 1981                         | 0                           |
| SBMNH                     | 743                     | ANBO                  | Santa Barbara        | 1982                         | 0                           |
| SBMNH                     | 1060                    | HYRE                  | Santa Barbara        | 1984                         | 0                           |
| SBMNH                     | 1067                    | ANBO                  | Santa Barbara        | 1984                         | 0                           |
| SBMNH                     | 1072                    | RADR                  | Santa Barbara        | 1984                         | 0                           |
| SBMNH                     | 1149                    | RADR                  | Santa Barbara        | 1985                         | 0                           |
| SBMNH                     | 1235                    | RACA                  | Santa Barbara        | 1986                         | 0                           |
| SBMNH                     | 1448                    | RACA                  | Santa Barbara        | 1989                         | 0                           |
| SBMNH                     | 1522                    | RADR                  | Santa Barbara        | 1991                         | 0                           |
| SBMNH                     | 2043                    | ANBO                  | Santa Barbara        | 2000                         | 1                           |
| SBMNH                     | 2158                    | RADR                  | Santa Barbara        | 2001                         | 1                           |
| SBMNH                     | 2159                    | RADR                  | Santa Barbara        | 2001                         | 0                           |
| SBMNH                     | 2160                    | RADR                  | Santa Barbara        | 2001                         | 0                           |
| SBMNH                     | 2162                    | RADR                  | Santa Barbara        | 2001                         | 0                           |
| SBMNH                     | 2166                    | RADR                  | Santa Barbara        | 2001                         | 0                           |
| SBMNH                     | 2186                    | HYRE                  | Santa Barbara        | 2001                         | 0                           |
| SBMNH                     | 2187                    | HYRE                  | Santa Barbara        | 2001                         | 0                           |
| SBMNH                     | 2188                    | HYRE                  | Santa Barbara        | 2001                         | 0                           |
| SBMNH                     | 2189                    | HYRE                  | Santa Barbara        | 2001                         | 0                           |
| SBMNH                     | 2217                    | RACA                  | Ventura              | 2001                         | 0                           |
| SBMNH                     | 2216                    | RACA                  | Ventura              | 2001                         | 0                           |
| SBMNH                     | 2382                    | HYRE                  | San Luis Obispo      | 2006                         | 0                           |
| SBMNH                     | 2387                    | HYRE                  | San Luis Obispo      | 2006                         | 0                           |
| SBMNH                     | 2388                    | HYRE                  | San Luis Obispo      | 2006                         | 0                           |
| SBMNH                     | 2389                    | HYRE                  | San Luis Obispo      | 2006                         | 0                           |
| SBMNH                     | 2390                    | HYRE                  | San Luis Obispo      | 2006                         | 0                           |
| SBMNH                     | 2450                    | HYRE                  | Los Angeles          | 2007                         | 0                           |
| SBMNH                     | 2451                    | HYRE                  | Los Angeles          | 2007                         | 0                           |
| SBMNH                     | 136                     | RABO                  | San Luis Obispo      | 1963                         | 0                           |
| SBMNH                     | 137                     | RABO                  | San Luis Obispo      | 1963                         | 0                           |

Appendix 2. Museum specimen data used for analysis. Reps positive = number of qPCR replicates (out of 3) in which Bd was detected. Species codes are available in Figure 3 of the main text.

| <b><u>Institution</u></b> | <b><u>Catalog #</u></b> | <b><u>Species</u></b> | <b><u>County</u></b> | <b><u>Year Collected</u></b> | <b><u>Reps Positive</u></b> |
|---------------------------|-------------------------|-----------------------|----------------------|------------------------------|-----------------------------|
| SBMNH                     | 138                     | RABO                  | San Luis Obispo      | 1963                         | 0                           |
| SBMNH                     | 139                     | RABO                  | San Luis Obispo      | 1963                         | 0                           |
| SBMNH                     | 140                     | RABO                  | San Luis Obispo      | 1963                         | 0                           |
| SBMNH                     | 135                     | TATO                  | San Luis Obispo      | 1963                         | 0                           |
| SBMNH                     | 215                     | TATO                  | Santa Barbara        | 1974                         | 2                           |
| SBMNH                     | 216                     | TATO                  | Santa Barbara        | 1974                         | 2                           |
| SBMNH                     | 217                     | TATO                  | Santa Barbara        | 1974                         | 0                           |
| SBMNH                     | 218                     | TATO                  | Santa Barbara        | 1974                         | 3                           |
| SBMNH                     | 568                     | TATO                  | Santa Barbara        | 1980                         | 3                           |
| SBMNH                     | 596                     | TATO                  | Santa Barbara        | 1980                         | 3                           |
| SBMNH                     | 620                     | TATO                  | Santa Barbara        | 1981                         | 3                           |
| SBMNH                     | 621                     | TATO                  | Santa Barbara        | 1981                         | 3                           |
| SBMNH                     | 622                     | TATO                  | Santa Barbara        | 1981                         | 3                           |
| SBMNH                     | 623                     | TATO                  | Santa Barbara        | 1981                         | 3                           |
| SBMNH                     | 624                     | TATO                  | Santa Barbara        | 1981                         | 3                           |
| SBMNH                     | 625                     | TATO                  | Santa Barbara        | 1981                         | 3                           |
| SBMNH                     | 626                     | TATO                  | Santa Barbara        | 1981                         | 3                           |
| SBMNH                     | 627                     | TATO                  | Santa Barbara        | 1981                         | 3                           |
| SBMNH                     | 628                     | TATO                  | Santa Barbara        | 1981                         | 3                           |
| SBMNH                     | 629                     | TATO                  | Santa Barbara        | 1981                         | 3                           |
| SBMNH                     | 1150                    | TATO                  | Santa Barbara        | 1985                         | 0                           |
| SBMNH                     | 1151                    | TATO                  | Santa Barbara        | 1985                         | 0                           |
| SBMNH                     | 1247                    | TATO                  | Santa Barbara        | 1986                         | 0                           |
| MVZ                       | 31615                   | RABO                  | San Luis Obispo      | 1939                         | 0                           |
| MVZ                       | 58422                   | RABO                  | San Luis Obispo      | 1953                         | 0                           |
| MVZ                       | 59660                   | RABO                  | San Luis Obispo      | 1953                         | 0                           |
| MVZ                       | 95868                   | HYRE                  | San Luis Obispo      | 1971                         | 3                           |
| MVZ                       | 107193                  | HYRE                  | San Luis Obispo      | 1972                         | 0                           |
| MVZ                       | 137354                  | HYRE                  | Santa Barbara        | 1976                         | 3                           |
| MVZ                       | 150009                  | HYRE                  | San Luis Obispo      | 1977                         | 1                           |
| MVZ                       | 227659                  | RACA                  | San Luis Obispo      | 1987                         | 0                           |
| MVZ                       | 240053                  | HYRE                  | Santa Barbara        | 1991                         | 3                           |
| MVZ                       | 27881                   | RACA                  | Los Angeles          | 1939                         | 3                           |
| MVZ                       | 32704                   | HYRE                  | Los Angeles          | 1940                         | 0                           |
| MVZ                       | 32705                   | HYRE                  | Los Angeles          | 1940                         | 0                           |
| MVZ                       | 32706                   | HYRE                  | Los Angeles          | 1940                         | 0                           |
| MVZ                       | 32708                   | HYRE                  | Los Angeles          | 1940                         | 0                           |
| MVZ                       | 32709                   | HYRE                  | Los Angeles          | 1940                         | 0                           |
| MVZ                       | 32710                   | HYRE                  | Los Angeles          | 1940                         | 0                           |
| MVZ                       | 32773                   | ANBO                  | Ventura              | 1940                         | 0                           |
| MVZ                       | 32774                   | HYCA                  | Ventura              | 1940                         | 0                           |

Appendix 2. Museum specimen data used for analysis. Reps positive = number of qPCR replicates (out of 3) in which Bd was detected. Species codes are available in Figure 3 of the main text.

| <u>Institution</u> | <u>Catalog #</u> | <u>Species</u> | <u>County</u>   | <u>Year Collected</u> | <u>Reps Positive</u> |
|--------------------|------------------|----------------|-----------------|-----------------------|----------------------|
| MVZ                | 32775            | HYCA           | Ventura         | 1940                  | 0                    |
| MVZ                | 33581            | RADR           | Santa Barbara   | 1940                  | 0                    |
| MVZ                | 33725            | HYCA           | Ventura         | 1940                  | 0                    |
| MVZ                | 33726            | HYCA           | Ventura         | 1940                  | 0                    |
| MVZ                | 33727            | HYCA           | Ventura         | 1940                  | 0                    |
| MVZ                | 33728            | HYCA           | Ventura         | 1940                  | 0                    |
| MVZ                | 33729            | HYCA           | Ventura         | 1940                  | 0                    |
| MVZ                | 33730            | HYCA           | Ventura         | 1940                  | 0                    |
| MVZ                | 34596            | HYRE           | Santa Barbara   | 1940                  | 1                    |
| MVZ                | 34597            | HYRE           | Santa Barbara   | 1940                  | 0                    |
| MVZ                | 35217            | ANCA           | Santa Barbara   | 1940                  | 0                    |
| MVZ                | 35218            | ANCA           | Santa Barbara   | 1940                  | 0                    |
| MVZ                | 35219            | HYRE           | Santa Barbara   | 1940                  | 0                    |
| MVZ                | 35220            | HYRE           | Santa Barbara   | 1940                  | 0                    |
| MVZ                | 35221            | HYRE           | Santa Barbara   | 1940                  | 0                    |
| MVZ                | 35364            | ANBO           | Ventura         | 1940                  | 0                    |
| MVZ                | 35365            | HYRE           | Santa Barbara   | 1940                  | 0                    |
| MVZ                | 35366            | HYRE           | Santa Barbara   | 1940                  | 0                    |
| MVZ                | 57042            | RADR           | Los Angeles     | 1952                  | 0                    |
| MVZ                | 59684            | RADR           | San Luis Obispo | 1953                  | 0                    |
| MVZ                | 61054            | HYCA           | Ventura         | 1954                  | 0                    |
| MVZ                | 61055            | HYCA           | Ventura         | 1954                  | 0                    |
| MVZ                | 61056            | HYCA           | Ventura         | 1954                  | 0                    |
| MVZ                | 61057            | HYCA           | Ventura         | 1954                  | 1                    |
| MVZ                | 61058            | HYCA           | Ventura         | 1954                  | 0                    |
| MVZ                | 61059            | HYCA           | Ventura         | 1954                  | 0                    |
| MVZ                | 61060            | HYCA           | Ventura         | 1954                  | 0                    |
| MVZ                | 95869            | HYRE           | Santa Barbara   | 1971                  | 1                    |
| MVZ                | 145257           | ANBO           | Santa Barbara   | 1977                  | 0                    |
| MVZ                | 145258           | ANBO           | Santa Barbara   | 1977                  | 0                    |
| MVZ                | 145259           | ANBO           | Santa Barbara   | 1977                  | 0                    |
| MVZ                | 145260           | ANBO           | Santa Barbara   | 1977                  | 0                    |
| MVZ                | 145261           | ANBO           | Santa Barbara   | 1977                  | 0                    |
| MVZ                | 145262           | ANBO           | Santa Barbara   | 1977                  | 0                    |
| MVZ                | 145263           | ANBO           | Santa Barbara   | 1977                  | 0                    |
| MVZ                | 145264           | ANBO           | Santa Barbara   | 1977                  | 0                    |
| MVZ                | 145265           | ANBO           | Santa Barbara   | 1977                  | 3                    |
| MVZ                | 145266           | ANBO           | Santa Barbara   | 1977                  | 0                    |
| MVZ                | 145267           | ANBO           | Santa Barbara   | 1977                  | 0                    |
| MVZ                | 145268           | ANBO           | Santa Barbara   | 1977                  | 0                    |
| MVZ                | 145269           | ANBO           | Santa Barbara   | 1977                  | 0                    |



Appendix 2. Museum specimen data used for analysis. Reps positive = number of qPCR replicates (out of 3) in which Bd was detected. Species codes are available in Figure 3 of the main text.

| <u>Institution</u> | <u>Catalog #</u> | <u>Species</u> | <u>County</u>   | <u>Year Collected</u> | <u>Reps Positive</u> |
|--------------------|------------------|----------------|-----------------|-----------------------|----------------------|
| MVZ                | 145270           | ANBO           | Santa Barbara   | 1977                  | 0                    |
| MVZ                | 145271           | ANBO           | Santa Barbara   | 1977                  | 0                    |
| MVZ                | 145272           | ANBO           | Santa Barbara   | 1977                  | 0                    |
| MVZ                | 35222            | RABO           | Santa Barbara   | 1940                  | 0                    |
| MVZ                | 187306           | RADR           | Santa Barbara   | 1960                  | 0                    |
| MVZ                | 187307           | RADR           | Santa Barbara   | 1960                  | 0                    |
| MVZ                | 239695           | ANBO           | Santa Barbara   | 1992                  | 2                    |
| MVZ                | 240615           | ANBO           | Ventura         | 1990                  | 0                    |
| MVZ                | 33664            | RABO           | Ventura         | 1940                  | 0                    |
| MVZ                | 33665            | RABO           | Ventura         | 1940                  | 0                    |
| MVZ                | 33666            | RABO           | Ventura         | 1940                  | 0                    |
| MVZ                | 33667            | RABO           | Ventura         | 1940                  | 0                    |
| MVZ                | 33668            | RABO           | Ventura         | 1940                  | 2                    |
| MVZ                | 33669            | RABO           | Ventura         | 1940                  | 0                    |
| MVZ                | 33670            | RABO           | Ventura         | 1940                  | 0                    |
| MVZ                | 33671            | RABO           | Ventura         | 1940                  | 0                    |
| MVZ                | 33672            | RABO           | Ventura         | 1940                  | 1                    |
| MVZ                | 33673            | RABO           | Ventura         | 1940                  | 1                    |
| MVZ                | 42611            | RABO           | Ventura         | 1946                  | 0                    |
| MVZ                | 54519            | RABO           | Ventura         | 1940                  | 0                    |
| LACM               | 1360             | HYRE           | Los Angeles     | 1937                  | 0                    |
| LACM               | 1656             | RADR           | San Luis Obispo | 1946                  | 0                    |
| LACM               | 1657             | RADR           | San Luis Obispo | 1946                  | 0                    |
| LACM               | 1658             | RADR           | San Luis Obispo | 1946                  | 0                    |
| LACM               | 13712            | RABO           | Los Angeles     | 1948                  | 0                    |
| LACM               | 13713            | RABO           | Los Angeles     | 1948                  | 0                    |
| LACM               | 13714            | RABO           | Los Angeles     | 1948                  | 0                    |
| LACM               | 13715            | RABO           | Los Angeles     | 1948                  | 0                    |
| LACM               | 13716            | RABO           | Los Angeles     | 1948                  | 0                    |
| LACM               | 13717            | RABO           | Los Angeles     | 1948                  | 1                    |
| LACM               | 13718            | RABO           | Los Angeles     | 1948                  | 0                    |
| LACM               | 12303            | HYCA           | Santa Barbara   | 1965                  | 0                    |
| LACM               | 12672            | HYRE           | Santa Barbara   | 1955                  | 0                    |
| LACM               | 12678            | HYRE           | Santa Barbara   | 1965                  | 0                    |
| LACM               | 12679            | HYRE           | Santa Barbara   | 1965                  | 0                    |
| LACM               | 12681            | HYRE           | Santa Barbara   | 1965                  | 0                    |
| LACM               | 12682            | HYRE           | Ventura         | 1953                  | 0                    |
| LACM               | 12683            | HYRE           | Ventura         | 1953                  | 0                    |
| LACM               | 12684            | HYRE           | Ventura         | 1954                  | 0                    |
| LACM               | 12685            | HYRE           | Ventura         | 1954                  | 0                    |
| LACM               | 12686            | HYRE           | Ventura         | 1963                  | 0                    |

Appendix 2. Museum specimen data used for analysis. Reps positive = number of qPCR replicates (out of 3) in which Bd was detected. Species codes are available in Figure 3 of the main text.

| <u>Institution</u> | <u>Catalog #</u> | <u>Species</u> | <u>County</u> | <u>Year Collected</u> | <u>Reps Positive</u> |
|--------------------|------------------|----------------|---------------|-----------------------|----------------------|
| LACM               | 12687            | HYRE           | Ventura       | 1955                  | 0                    |
| LACM               | 12688            | HYRE           | Ventura       | 1955                  | 0                    |
| LACM               | 12690            | HYRE           | Ventura       | 1955                  | 0                    |
| LACM               | 12691            | HYRE           | Ventura       | 1955                  | 0                    |
| LACM               | 12692            | HYRE           | Ventura       | 1955                  | 0                    |
| LACM               | 12693            | HYRE           | Ventura       | 1955                  | 0                    |
| LACM               | 12694            | HYRE           | Ventura       | 1953                  | 0                    |
| LACM               | 12695            | HYRE           | Ventura       | 1955                  | 0                    |
| LACM               | 12696            | HYRE           | Ventura       | 1955                  | 1                    |
| LACM               | 12697            | HYRE           | Ventura       | 1955                  | 0                    |
| LACM               | 12698            | HYRE           | Ventura       | 1955                  | 0                    |
| LACM               | 12699            | HYRE           | Ventura       | 1955                  | 0                    |
| LACM               | 12700            | HYRE           | Ventura       | 1955                  | 0                    |
| LACM               | 12701            | HYRE           | Ventura       | 1955                  | 0                    |
| LACM               | 12702            | HYRE           | Ventura       | 1955                  | 0                    |
| LACM               | 12703            | HYRE           | Ventura       | 1955                  | 0                    |
| LACM               | 12704            | HYRE           | Ventura       | 1955                  | 0                    |
| LACM               | 12705            | HYRE           | Ventura       | 1955                  | 0                    |
| LACM               | 12706            | HYRE           | Ventura       | 1955                  | 0                    |
| LACM               | 12707            | HYRE           | Ventura       | 1955                  | 0                    |
| LACM               | 12708            | HYRE           | Ventura       | 1955                  | 0                    |
| LACM               | 12709            | HYRE           | Ventura       | 1955                  | 0                    |
| LACM               | 12710            | HYRE           | Ventura       | 1955                  | 0                    |
| LACM               | 12711            | HYRE           | Ventura       | 1955                  | 0                    |
| LACM               | 12712            | HYRE           | Ventura       | 1955                  | 0                    |
| LACM               | 12713            | HYRE           | Ventura       | 1955                  | 0                    |
| LACM               | 12714            | HYRE           | Ventura       | 1955                  | 0                    |
| LACM               | 12715            | HYRE           | Ventura       | 1955                  | 0                    |
| LACM               | 12716            | HYRE           | Ventura       | 1955                  | 0                    |
| LACM               | 12718            | HYRE           | Ventura       | 1955                  | 0                    |
| LACM               | 12720            | HYRE           | Ventura       | 1955                  | 0                    |
| LACM               | 12721            | HYRE           | Ventura       | 1955                  | 0                    |
| LACM               | 12722            | HYRE           | Ventura       | 1955                  | 0                    |
| LACM               | 12723            | HYRE           | Ventura       | 1955                  | 0                    |
| LACM               | 12724            | HYRE           | Ventura       | 1955                  | 0                    |
| LACM               | 12790            | HYRE           | Los Angeles   | 1955                  | 0                    |
| LACM               | 12798            | HYRE           | Los Angeles   | 1953                  | 0                    |
| LACM               | 12800            | HYRE           | Los Angeles   | 1953                  | 0                    |
| LACM               | 12808            | HYRE           | Los Angeles   | 1953                  | 0                    |
| LACM               | 12811            | HYRE           | Los Angeles   | 1953                  | 0                    |
| LACM               | 12815            | HYRE           | Los Angeles   | 1953                  | 0                    |

Appendix 2. Museum specimen data used for analysis. Reps positive = number of qPCR replicates (out of 3) in which Bd was detected. Species codes are available in Figure 3 of the main text.

| <u>Institution</u> | <u>Catalog #</u> | <u>Species</u> | <u>County</u> | <u>Year Collected</u> | <u>Reps Positive</u> |
|--------------------|------------------|----------------|---------------|-----------------------|----------------------|
| LACM               | 12828            | HYRE           | Los Angeles   | 1965                  | 0                    |
| LACM               | 12829            | HYRE           | Los Angeles   | 1965                  | 0                    |
| LACM               | 12830            | HYRE           | Los Angeles   | 1963                  | 0                    |
| LACM               | 12831            | HYRE           | Los Angeles   | 1963                  | 0                    |
| LACM               | 12833            | HYRE           | Los Angeles   | 1963                  | 0                    |
| LACM               | 12834            | HYRE           | Los Angeles   | 1964                  | 0                    |
| LACM               | 12835            | HYRE           | Los Angeles   | 1964                  | 0                    |
| LACM               | 12836            | HYRE           | Los Angeles   | 1964                  | 0                    |
| LACM               | 12840            | HYRE           | Los Angeles   | 1942                  | 0                    |
| LACM               | 12842            | HYRE           | Los Angeles   | 1965                  | 0                    |
| LACM               | 12844            | HYRE           | Los Angeles   | 1964                  | 0                    |
| LACM               | 12845            | HYRE           | Los Angeles   | 1964                  | 0                    |
| LACM               | 12846            | HYRE           | Los Angeles   | 1964                  | 0                    |
| LACM               | 12847            | HYRE           | Los Angeles   | 1964                  | 0                    |
| LACM               | 12849            | HYRE           | Los Angeles   | 1964                  | 0                    |
| LACM               | 12850            | HYRE           | Los Angeles   | 1964                  | 0                    |
| LACM               | 12851            | HYRE           | Los Angeles   | 1964                  | 0                    |
| LACM               | 12852            | HYRE           | Los Angeles   | 1964                  | 0                    |
| LACM               | 12853            | HYRE           | Los Angeles   | 1964                  | 0                    |
| LACM               | 12854            | HYRE           | Los Angeles   | 1965                  | 0                    |
| LACM               | 12855            | HYRE           | Los Angeles   | 1954                  | 0                    |
| LACM               | 12859            | HYRE           | Los Angeles   | 1954                  | 0                    |
| LACM               | 12863            | HYRE           | Los Angeles   | 1964                  | 0                    |
| LACM               | 12868            | HYRE           | Los Angeles   | 1953                  | 0                    |
| LACM               | 12869            | HYRE           | Los Angeles   | 1953                  | 0                    |
| LACM               | 12873            | HYRE           | Los Angeles   | 1963                  | 0                    |
| LACM               | 12874            | HYRE           | Los Angeles   | 1963                  | 0                    |
| LACM               | 12875            | HYRE           | Los Angeles   | 1963                  | 0                    |
| LACM               | 12882            | HYRE           | Los Angeles   | 1964                  | 0                    |
| LACM               | 12884            | HYRE           | Los Angeles   | 1954                  | 0                    |
| LACM               | 12886            | HYRE           | Los Angeles   | 1964                  | 0                    |
| LACM               | 12888            | HYRE           | Los Angeles   | 1964                  | 0                    |
| LACM               | 12891            | HYRE           | Los Angeles   | 1963                  | 0                    |
| LACM               | 12893            | HYRE           | Los Angeles   | 1963                  | 0                    |
| LACM               | 12894            | HYRE           | Los Angeles   | 1964                  | 0                    |
| LACM               | 12895            | HYRE           | Los Angeles   | 1964                  | 0                    |
| LACM               | 12897            | HYRE           | Los Angeles   | 1964                  | 0                    |
| LACM               | 12898            | HYRE           | Los Angeles   | 1955                  | 0                    |
| LACM               | 12930            | HYRE           | Los Angeles   | 1955                  | 0                    |
| LACM               | 12933            | HYRE           | Los Angeles   | 1955                  | 0                    |
| LACM               | 12936            | HYRE           | Los Angeles   | 1955                  | 0                    |

Appendix 2. Museum specimen data used for analysis. Reps positive = number of qPCR replicates (out of 3) in which Bd was detected. Species codes are available in Figure 3 of the main text.

| <u>Institution</u> | <u>Catalog #</u> | <u>Species</u> | <u>County</u> | <u>Year Collected</u> | <u>Reps Positive</u> |
|--------------------|------------------|----------------|---------------|-----------------------|----------------------|
| LACM               | 12939            | HYRE           | Los Angeles   | 1955                  | 0                    |
| LACM               | 12940            | HYRE           | Los Angeles   | 1955                  | 0                    |
| LACM               | 12945            | HYRE           | Los Angeles   | 1955                  | 1                    |
| LACM               | 12947            | HYRE           | Los Angeles   | 1955                  | 0                    |
| LACM               | 12950            | HYRE           | Los Angeles   | 1955                  | 0                    |
| LACM               | 12951            | HYRE           | Los Angeles   | 1955                  | 0                    |
| LACM               | 12955            | HYRE           | Los Angeles   | 1964                  | 0                    |
| LACM               | 12964            | HYRE           | Los Angeles   | 1955                  | 0                    |
| LACM               | 12965            | HYRE           | Los Angeles   | 1955                  | 0                    |
| LACM               | 12987            | HYRE           | Los Angeles   | 1963                  | 0                    |
| LACM               | 12996            | HYRE           | Los Angeles   | 1964                  | 0                    |
| LACM               | 13005            | HYRE           | Santa Barbara | 1963                  | 0                    |
| LACM               | 13006            | HYRE           | Santa Barbara | 1963                  | 0                    |
| LACM               | 13007            | HYRE           | Santa Barbara | 1963                  | 0                    |
| LACM               | 13008            | HYRE           | Santa Barbara | 1963                  | 0                    |
| LACM               | 13009            | HYRE           | Los Angeles   | 1955                  | 0                    |
| LACM               | 13196            | HYCA           | Ventura       | 1934                  | 0                    |
| LACM               | 13197            | HYCA           | Ventura       | 1934                  | 0                    |
| LACM               | 13198            | HYCA           | Ventura       | 1934                  | 0                    |
| LACM               | 13204            | HYCA           | Ventura       | 1963                  | 0                    |
| LACM               | 13205            | HYCA           | Ventura       | 1963                  | 0                    |
| LACM               | 13207            | HYCA           | Ventura       | 1954                  | 0                    |
| LACM               | 13209            | HYCA           | Ventura       | 1954                  | 0                    |
| LACM               | 13213            | HYCA           | Ventura       | 1950                  | 0                    |
| LACM               | 13215            | HYCA           | Ventura       | 1950                  | 0                    |
| LACM               | 13216            | HYCA           | Ventura       | 1950                  | 0                    |
| LACM               | 13218            | HYCA           | Ventura       | 1950                  | 0                    |
| LACM               | 13219            | HYCA           | Ventura       | 1950                  | 0                    |
| LACM               | 13221            | HYCA           | Ventura       | 1950                  | 0                    |
| LACM               | 13223            | HYCA           | Ventura       | 1950                  | 0                    |
| LACM               | 13225            | HYCA           | Ventura       | 1953                  | 0                    |
| LACM               | 13454            | RADR           | Los Angeles   | 1947                  | 0                    |
| LACM               | 13455            | RADR           | Los Angeles   | 1947                  | 2                    |
| LACM               | 13457            | RADR           | Los Angeles   | 1963                  | 2                    |
| LACM               | 13458            | RADR           | Los Angeles   | 1963                  | 0                    |
| LACM               | 13459            | RADR           | Los Angeles   | 1963                  | 0                    |
| LACM               | 13460            | RADR           | Los Angeles   | 1963                  | 0                    |
| LACM               | 13461            | RADR           | Los Angeles   | 1964                  | 1                    |
| LACM               | 13462            | RADR           | Los Angeles   | 1964                  | 0                    |
| LACM               | 13463            | RADR           | Los Angeles   | 1964                  | 0                    |
| LACM               | 13464            | RADR           | Los Angeles   | 1964                  | 0                    |

Appendix 2. Museum specimen data used for analysis. Reps positive = number of qPCR replicates (out of 3) in which Bd was detected. Species codes are available in Figure 3 of the main text.

| <u>Institution</u> | <u>Catalog #</u> | <u>Species</u> | <u>County</u> | <u>Year Collected</u> | <u>Reps Positive</u> |
|--------------------|------------------|----------------|---------------|-----------------------|----------------------|
| LACM               | 13465            | RADR           | Los Angeles   | 1964                  | 0                    |
| LACM               | 13466            | RADR           | Los Angeles   | 1964                  | 0                    |
| LACM               | 13467            | RADR           | Los Angeles   | 1964                  | 0                    |
| LACM               | 13468            | RADR           | Los Angeles   | 1963                  | 0                    |
| LACM               | 13469            | RADR           | Los Angeles   | 1963                  | 0                    |
| LACM               | 13470            | RADR           | Los Angeles   | 1954                  | 0                    |
| LACM               | 13475            | RADR           | Los Angeles   | 1947                  | 0                    |
| LACM               | 13496            | RADR           | Ventura       | 1954                  | 2                    |
| LACM               | 13497            | RADR           | Ventura       | 1954                  | 0                    |
| LACM               | 13498            | RADR           | Ventura       | 1950                  | 1                    |
| LACM               | 13499            | RADR           | Ventura       | 1955                  | 0                    |
| LACM               | 13500            | RADR           | Santa Barbara | 1965                  | 0                    |
| LACM               | 13501            | RADR           | Santa Barbara | 1965                  | 0                    |
| LACM               | 13502            | RADR           | Santa Barbara | 1965                  | 0                    |
| LACM               | 13503            | RADR           | Santa Barbara | 1965                  | 0                    |
| LACM               | 13531            | RACA           | Los Angeles   | 1963                  | 0                    |
| LACM               | 13532            | RACA           | Los Angeles   | 1963                  | 0                    |
| LACM               | 13539            | RACA           | Ventura       | 1963                  | 0                    |
| LACM               | 13719            | RABO           | Los Angeles   | 1948                  | 0                    |
| LACM               | 13720            | RABO           | Los Angeles   | 1948                  | 0                    |
| LACM               | 13721            | RABO           | Los Angeles   | 1948                  | 0                    |
| LACM               | 13722            | RABO           | Los Angeles   | 1948                  | 0                    |
| LACM               | 13723            | RABO           | Los Angeles   | 1948                  | 0                    |
| LACM               | 13724            | RABO           | Los Angeles   | 1948                  | 1                    |
| LACM               | 13725            | RABO           | Los Angeles   | 1948                  | 0                    |
| LACM               | 13726            | RABO           | Los Angeles   | 1948                  | 0                    |
| LACM               | 13727            | RABO           | Los Angeles   | 1948                  | 0                    |
| LACM               | 13728            | RABO           | Los Angeles   | 1950                  | 0                    |
| LACM               | 13729            | RABO           | Los Angeles   | 1950                  | 0                    |
| LACM               | 13730            | RABO           | Los Angeles   | 1950                  | 0                    |
| LACM               | 13731            | RABO           | Los Angeles   | 1950                  | 0                    |
| LACM               | 13732            | RABO           | Los Angeles   | 1950                  | 0                    |
| LACM               | 13733            | RABO           | Los Angeles   | 1950                  | 0                    |
| LACM               | 13734            | RABO           | Los Angeles   | 1950                  | 1                    |
| LACM               | 13735            | RABO           | Los Angeles   | 1947                  | 0                    |
| LACM               | 13738            | RABO           | Los Angeles   | 1950                  | 0                    |
| LACM               | 13739            | RABO           | Los Angeles   | 1963                  | 0                    |
| LACM               | 13740            | RABO           | Los Angeles   | 1963                  | 0                    |
| LACM               | 13741            | RABO           | Los Angeles   | 1950                  | 1                    |
| LACM               | 13742            | RABO           | Los Angeles   | 1950                  | 0                    |
| LACM               | 13743            | RABO           | Los Angeles   | 1950                  | 0                    |

Appendix 2. Museum specimen data used for analysis. Reps positive = number of qPCR replicates (out of 3) in which Bd was detected. Species codes are available in Figure 3 of the main text.

| <u>Institution</u> | <u>Catalog #</u> | <u>Species</u> | <u>County</u> | <u>Year Collected</u> | <u>Reps Positive</u> |
|--------------------|------------------|----------------|---------------|-----------------------|----------------------|
| LACM               | 13744            | RABO           | Los Angeles   | 1950                  | 0                    |
| LACM               | 13745            | RABO           | Los Angeles   | 1950                  | 0                    |
| LACM               | 13746            | RABO           | Los Angeles   | 1950                  | 0                    |
| LACM               | 13764            | RABO           | Los Angeles   | 1955                  | 0                    |
| LACM               | 13765            | RABO           | Los Angeles   | 1950                  | 0                    |
| LACM               | 26591            | RABO           | Los Angeles   | 1959                  | 0                    |
| LACM               | 26592            | RABO           | Los Angeles   | 1959                  | 0                    |
| LACM               | 26593            | RABO           | Los Angeles   | 1960                  | 0                    |
| LACM               | 26594            | RABO           | Los Angeles   | 1960                  | 0                    |
| LACM               | 26595            | RABO           | Los Angeles   | 1960                  | 0                    |
| LACM               | 26596            | RABO           | Los Angeles   | 1960                  | 0                    |
| LACM               | 26597            | RABO           | Los Angeles   | 1966                  | 0                    |
| LACM               | 91524            | RABO           | Los Angeles   | 1951                  | 0                    |
| LACM               | 91525            | RABO           | Los Angeles   | 1951                  | 0                    |
| LACM               | 91526            | RABO           | Los Angeles   | 1957                  | 0                    |
| LACM               | 141854           | RABO           | Los Angeles   | 1944                  | 1                    |
| LACM               | 141855           | RABO           | Los Angeles   | 1944                  | 0                    |
| LACM               | 141856           | RABO           | Los Angeles   | 1944                  | 0                    |
| LACM               | 141857           | RABO           | Los Angeles   | 1944                  | 0                    |
| LACM               | 13767            | RADR           | Los Angeles   | 1956                  | 0                    |
| LACM               | 13768            | RADR           | Los Angeles   | 1956                  | 0                    |
| LACM               | 26454            | HYRE           | Los Angeles   | 1959                  | 0                    |
| LACM               | 26456            | HYRE           | Los Angeles   | 1959                  | 0                    |
| LACM               | 26457            | HYRE           | Los Angeles   | 1959                  | 0                    |
| LACM               | 26459            | HYRE           | Los Angeles   | 1959                  | 0                    |
| LACM               | 26460            | HYRE           | Los Angeles   | 1959                  | 0                    |
| LACM               | 26462            | HYRE           | Los Angeles   | 1959                  | 0                    |
| LACM               | 26464            | HYRE           | Los Angeles   | 1959                  | 0                    |
| LACM               | 26469            | HYRE           | Los Angeles   | 1959                  | 0                    |
| LACM               | 26470            | HYRE           | Los Angeles   | 1959                  | 0                    |
| LACM               | 26485            | HYRE           | Los Angeles   | 1957                  | 0                    |
| LACM               | 26486            | HYRE           | Los Angeles   | 1966                  | 0                    |
| LACM               | 26487            | HYRE           | Los Angeles   | 1966                  | 0                    |
| LACM               | 26489            | HYRE           | Los Angeles   | 1966                  | 0                    |
| LACM               | 26491            | HYRE           | Los Angeles   | 1966                  | 0                    |
| LACM               | 26492            | HYRE           | Los Angeles   | 1966                  | 0                    |
| LACM               | 26493            | HYRE           | Los Angeles   | 1964                  | 0                    |
| LACM               | 26582            | RADR           | Los Angeles   | 1960                  | 0                    |
| LACM               | 26584            | RADR           | Los Angeles   | 1959                  | 0                    |
| LACM               | 26585            | RADR           | Los Angeles   | 1959                  | 0                    |
| LACM               | 26617            | RACA           | Los Angeles   | 1959                  | 0                    |

Appendix 2. Museum specimen data used for analysis. Reps positive = number of qPCR replicates (out of 3) in which Bd was detected. Species codes are available in Figure 3 of the main text.

| <u>Institution</u> | <u>Catalog #</u> | <u>Species</u> | <u>County</u>   | <u>Year Collected</u> | <u>Reps Positive</u> |
|--------------------|------------------|----------------|-----------------|-----------------------|----------------------|
| LACM               | 26618            | RACA           | Los Angeles     | 1959                  | 0                    |
| LACM               | 26619            | RACA           | Los Angeles     | 1959                  | 0                    |
| LACM               | 26621            | RACA           | Los Angeles     | 1959                  | 0                    |
| LACM               | 149145           | RABO           | San Luis Obispo | 1999                  | 0                    |
| LACM               | 35942            | HYRE           | Santa Barbara   | 1967                  | 0                    |
| LACM               | 37657            | HYRE           | Los Angeles     | 1967                  | 0                    |
| LACM               | 37659            | HYRE           | Los Angeles     | 1967                  | 0                    |
| LACM               | 37660            | HYRE           | Los Angeles     | 1967                  | 0                    |
| LACM               | 60428            | HYRE           | Ventura         | 1965                  | 1                    |
| LACM               | 60429            | HYRE           | Ventura         | 1965                  | 0                    |
| LACM               | 64217            | HYCA           | Ventura         | 1965                  | 0                    |
| LACM               | 74408            | RADR           | Los Angeles     | 1965                  | 0                    |
| LACM               | 74409            | RADR           | Los Angeles     | 1965                  | 0                    |
| LACM               | 74410            | RADR           | Los Angeles     | 1965                  | 0                    |
| LACM               | 74411            | RADR           | Los Angeles     | 1965                  | 0                    |
| LACM               | 74412            | RADR           | Los Angeles     | 1950                  | 0                    |
| LACM               | 74413            | RADR           | Los Angeles     | 1950                  | 0                    |
| LACM               | 74681            | HYRE           | Los Angeles     | 1965                  | 0                    |
| LACM               | 74682            | HYRE           | Los Angeles     | 1965                  | 0                    |
| LACM               | 74688            | HYRE           | Los Angeles     | 1964                  | 0                    |
| LACM               | 74689            | HYRE           | Los Angeles     | 1965                  | 0                    |
| LACM               | 74690            | HYRE           | Los Angeles     | 1965                  | 0                    |
| LACM               | 74691            | HYRE           | Los Angeles     | 1965                  | 0                    |
| LACM               | 74695            | HYRE           | Los Angeles     | 1965                  | 0                    |
| LACM               | 74696            | HYRE           | Los Angeles     | 1965                  | 0                    |
| LACM               | 74697            | HYRE           | Los Angeles     | 1965                  | 0                    |
| LACM               | 74703            | HYRE           | Los Angeles     | 1965                  | 0                    |
| LACM               | 74778            | HYRE           | Los Angeles     | 1965                  | 0                    |
| LACM               | 74788            | RADR           | Los Angeles     | 1965                  | 0                    |
| LACM               | 74789            | HYRE           | Los Angeles     | 1965                  | 0                    |
| LACM               | 74790            | HYRE           | Los Angeles     | 1965                  | 0                    |
| LACM               | 74791            | RADR           | Ventura         | 1930                  | 0                    |
| LACM               | 75214            | HYRE           | Los Angeles     | 1971                  | 0                    |
| LACM               | 75215            | HYRE           | Los Angeles     | 1971                  | 3                    |
| LACM               | 75695            | HYRE           | Ventura         | 1972                  | 0                    |
| LACM               | 75696            | HYRE           | Ventura         | 1972                  | 0                    |
| LACM               | 75698            | HYRE           | Ventura         | 1972                  | 0                    |
| LACM               | 76274            | RADR           | Ventura         | 1968                  | 3                    |
| LACM               | 76499            | HYRE           | Los Angeles     | 1966                  | 0                    |
| LACM               | 76500            | HYRE           | Los Angeles     | 1966                  | 0                    |
| LACM               | 89847            | HYRE           | Santa Barbara   | 1964                  | 0                    |

Appendix 2. Museum specimen data used for analysis. Reps positive = number of qPCR replicates (out of 3) in which Bd was detected. Species codes are available in Figure 3 of the main text.

| <u>Institution</u> | <u>Catalog #</u> | <u>Species</u> | <u>County</u>   | <u>Year Collected</u> | <u>Reps Positive</u> |
|--------------------|------------------|----------------|-----------------|-----------------------|----------------------|
| LACM               | 89848            | HYRE           | Santa Barbara   | 1967                  | 0                    |
| LACM               | 89849            | HYRE           | Santa Barbara   | 1967                  | 0                    |
| LACM               | 89850            | HYRE           | Santa Barbara   | 1967                  | 0                    |
| LACM               | 89851            | HYRE           | Santa Barbara   | 1967                  | 0                    |
| LACM               | 89852            | HYRE           | Santa Barbara   | 1967                  | 0                    |
| LACM               | 89853            | HYRE           | Santa Barbara   | 1967                  | 0                    |
| LACM               | 89854            | HYRE           | Santa Barbara   | 1967                  | 0                    |
| LACM               | 89855            | HYRE           | Santa Barbara   | 1967                  | 0                    |
| LACM               | 89857            | HYRE           | Santa Barbara   | 1964                  | 0                    |
| LACM               | 89868            | HYRE           | Santa Barbara   | 1964                  | 0                    |
| LACM               | 89869            | HYRE           | Santa Barbara   | 1966                  | 0                    |
| LACM               | 89876            | HYRE           | Ventura         | 1966                  | 0                    |
| LACM               | 89877            | HYRE           | Ventura         | 1966                  | 0                    |
| LACM               | 89878            | HYRE           | Ventura         | 1966                  | 0                    |
| LACM               | 91109            | RADR           | Santa Barbara   | 1964                  | 0                    |
| LACM               | 91110            | RADR           | Santa Barbara   | 1964                  | 0                    |
| LACM               | 91141            | RADR           | Santa Barbara   | 1969                  | 0                    |
| LACM               | 91535            | RACA           | Los Angeles     | 1964                  | 0                    |
| LACM               | 91537            | RACA           | Los Angeles     | 1952                  | 0                    |
| LACM               | 91539            | RACA           | Los Angeles     | 1955                  | 0                    |
| LACM               | 91549            | RACA           | Los Angeles     | 1966                  | 0                    |
| LACM               | 105871           | HYCA           | Santa Barbara   | 1969                  | 0                    |
| LACM               | 105872           | HYCA           | Ventura         | 1970                  | 1                    |
| LACM               | 105873           | HYCA           | Ventura         | 1970                  | 0                    |
| LACM               | 105894           | HYRE           | Los Angeles     | 1972                  | 3                    |
| LACM               | 105895           | HYRE           | Los Angeles     | 1972                  | 3                    |
| LACM               | 105896           | HYRE           | Los Angeles     | 1972                  | 1                    |
| LACM               | 105979           | HYRE           | San Luis Obispo | 1968                  | 0                    |
| LACM               | 105980           | HYRE           | Santa Barbara   | 1972                  | 0                    |
| LACM               | 105981           | HYRE           | Santa Barbara   | 1972                  | 0                    |
| LACM               | 105982           | HYRE           | Santa Barbara   | 1972                  | 2                    |
| LACM               | 105987           | HYRE           | Ventura         | 1970                  | 0                    |
| LACM               | 106030           | RADR           | San Luis Obispo | 1968                  | 0                    |
| LACM               | 106036           | RACA           | Los Angeles     | 1970                  | 0                    |
| LACM               | 106037           | RACA           | Los Angeles     | 1970                  | 0                    |
| LACM               | 126081           | HYRE           | Santa Barbara   | 1977                  | 0                    |
| LACM               | 126085           | RADR           | Santa Barbara   | 1977                  | 3                    |
| LACM               | 135325           | RADR           | Santa Barbara   | 1981                  | 0                    |
| LACM               | 135326           | RADR           | Santa Barbara   | 1981                  | 1                    |
| LACM               | 135327           | RADR           | Santa Barbara   | 1981                  | 0                    |
| LACM               | 135328           | RADR           | Santa Barbara   | 1981                  | 0                    |



Appendix 2. Museum specimen data used for analysis. Reps positive = number of qPCR replicates (out of 3) in which Bd was detected. Species codes are available in Figure 3 of the main text.

| <u>Institution</u> | <u>Catalog #</u> | <u>Species</u> | <u>County</u>   | <u>Year Collected</u> | <u>Reps Positive</u> |
|--------------------|------------------|----------------|-----------------|-----------------------|----------------------|
| LACM               | 135329           | RADR           | Santa Barbara   | 1981                  | 0                    |
| LACM               | 135330           | RADR           | Santa Barbara   | 1981                  | 0                    |
| LACM               | 135331           | RADR           | Santa Barbara   | 1981                  | 0                    |
| LACM               | 135332           | RADR           | Santa Barbara   | 1981                  | 0                    |
| LACM               | 135333           | RADR           | Santa Barbara   | 1981                  | 0                    |
| LACM               | 135334           | RADR           | Santa Barbara   | 1981                  | 2                    |
| LACM               | 135335           | RADR           | Santa Barbara   | 1981                  | 4                    |
| LACM               | 135336           | RADR           | Santa Barbara   | 1981                  | 0                    |
| LACM               | 135337           | RADR           | Santa Barbara   | 1981                  | 0                    |
| LACM               | 135338           | RADR           | Santa Barbara   | 1981                  | 4                    |
| LACM               | 135339           | RADR           | Santa Barbara   | 1981                  | 4                    |
| LACM               | 135340           | RADR           | Santa Barbara   | 1981                  | 0                    |
| LACM               | 135341           | RADR           | Santa Barbara   | 1981                  | 3                    |
| LACM               | 135342           | RADR           | Santa Barbara   | 1981                  | 0                    |
| LACM               | 135343           | RADR           | Santa Barbara   | 1981                  | 0                    |
| LACM               | 135344           | RADR           | Santa Barbara   | 1981                  | 3                    |
| LACM               | 137083           | HYRE           | Santa Barbara   | 1986                  | 0                    |
| LACM               | 137804           | HYRE           | Ventura         | 1982                  | 0                    |
| LACM               | 139127           | RACA           | San Luis Obispo | 1991                  | 3                    |
| LACM               | 141860           | RACA           | Los Angeles     | 1959                  | 0                    |
| LACM               | 141861           | RACA           | Los Angeles     | 1959                  | 0                    |
| LACM               | 141862           | RACA           | Los Angeles     | 1959                  | 0                    |
| LACM               | 141863           | RACA           | Los Angeles     | 1959                  | 0                    |
| LACM               | 141864           | RACA           | Los Angeles     | 1959                  | 0                    |
| LACM               | 141865           | RACA           | Los Angeles     | 1959                  | 0                    |
| LACM               | 141866           | RACA           | Los Angeles     | 1959                  | 0                    |
| LACM               | 141867           | RACA           | Los Angeles     | 1959                  | 0                    |
| LACM               | 141868           | RACA           | Los Angeles     | 1959                  | 0                    |
| LACM               | 141869           | RACA           | Los Angeles     | 1943                  | 0                    |
| LACM               | 141870           | RACA           | Los Angeles     | 1943                  | 0                    |
| LACM               | 149087           | HYCA           | Los Angeles     | 2001                  | 0                    |
| LACM               | 149088           | HYCA           | Los Angeles     | 2001                  | 0                    |
| LACM               | 149094           | HYCA           | Los Angeles     | 2000                  | 0                    |
| LACM               | 149095           | HYCA           | Los Angeles     | 2000                  | 0                    |
| LACM               | 149097           | HYCA           | Los Angeles     | 2000                  | 2                    |
| LACM               | 149140           | RADR           | San Luis Obispo | 1999                  | 3                    |
| LACM               | 149141           | RADR           | San Luis Obispo | 2001                  | 3                    |
| LACM               | 149142           | RACA           | San Luis Obispo | 2001                  | 3                    |
| LACM               | 149143           | RACA           | San Luis Obispo | 2001                  | 3                    |
| LACM               | 149144           | RACA           | San Luis Obispo | 2001                  | 3                    |
| LACM               | 149673           | ANBO           | Santa Barbara   | 2001                  | 0                    |

Appendix 2. Museum specimen data used for analysis. Reps positive = number of qPCR replicates (out of 3) in which Bd was detected. Species codes are available in Figure 3 of the main text.

| <u>Institution</u> | <u>Catalog #</u> | <u>Species</u> | <u>County</u> | <u>Year Collected</u> | <u>Reps Positive</u> |
|--------------------|------------------|----------------|---------------|-----------------------|----------------------|
| LACM               | 150354           | RADR           | Ventura       | 2001                  | 0                    |
| LACM               | 1956             | RABO           | Ventura       | 1930                  | 0                    |
| LACM               | 13690            | RABO           | Ventura       | 1954                  | 0                    |
| LACM               | 13691            | RABO           | Ventura       | 1963                  | 0                    |
| LACM               | 13694            | RABO           | Ventura       | 1950                  | 0                    |
| LACM               | 13695            | RABO           | Ventura       | 1950                  | 0                    |
| LACM               | 13696            | RABO           | Ventura       | 1950                  | 0                    |
| LACM               | 13697            | RABO           | Ventura       | 1950                  | 1                    |
| LACM               | 13698            | RABO           | Ventura       | 1950                  | 0                    |
| LACM               | 13699            | RABO           | Ventura       | 1954                  | 0                    |
| LACM               | 13700            | RABO           | Ventura       | 1954                  | 1                    |
| LACM               | 13701            | RABO           | Ventura       | 1954                  | 0                    |
| LACM               | 13702            | RABO           | Ventura       | 1954                  | 0                    |
| LACM               | 13703            | RABO           | Ventura       | 1954                  | 2                    |
| LACM               | 13704            | RABO           | Ventura       | 1954                  | 0                    |
| LACM               | 76268            | RABO           | Ventura       | 1968                  | 0                    |
| LACM               | 76269            | RABO           | Ventura       | 1968                  | 0                    |
| LACM               | 76270            | RABO           | Ventura       | 1968                  | 0                    |
| LACM               | 76271            | RABO           | Ventura       | 1968                  | 0                    |
| LACM               | 76272            | RABO           | Ventura       | 1968                  | 0                    |
| LACM               | 76273            | RABO           | Ventura       | 1968                  | 0                    |
| LACM               | 106062           | RABO           | Ventura       | 1970                  | 0                    |
| CPP                | 116              | RABO           | Los Angeles   | 1966                  | 3                    |
| CPP                | 683              | RABO           | Los Angeles   | 1968                  | 0                    |
| CPP                | 850              | RABO           | Los Angeles   | 1970                  | 3                    |
| CPP                | 1258             | RABO           | Los Angeles   | 1961                  | 1                    |
| CPP                | 1263             | RABO           | Los Angeles   | 1969                  | 0                    |
| CPP                | 1265             | RABO           | Los Angeles   | 1969                  | 0                    |
| CPP                | 850B             | RABO           | Los Angeles   | 1970                  | 3                    |
| CAS                | 7225             | RABO           | Los Angeles   | 1940                  | 0                    |
| CAS                | 3601             | ANBO           | Los Angeles   | 1929                  | 0                    |
| CAS                | 3602             | ANBO           | Los Angeles   | 1929                  | 0                    |
| CAS                | 3603             | ANBO           | Los Angeles   | 1929                  | 0                    |
| CAS                | 3604             | ANBO           | Los Angeles   | 1929                  | 0                    |
| CAS                | 7226             | RABO           | Los Angeles   | 1940                  | 0                    |
| CAS                | 7227             | RABO           | Los Angeles   | 1940                  | 0                    |
| CAS                | 7228             | RABO           | Los Angeles   | 1940                  | 0                    |
| CAS                | 7418             | ANBO           | Los Angeles   | 1940                  | 0                    |
| CAS                | 10111            | ANBO           | Ventura       | 1949                  | 0                    |
| CAS                | 10112            | ANBO           | Ventura       | 1949                  | 0                    |
| CAS                | 10113            | ANBO           | Ventura       | 1949                  | 0                    |

Appendix 2. Museum specimen data used for analysis. Reps positive = number of qPCR replicates (out of 3) in which Bd was detected. Species codes are available in Figure 3 of the main text.

| <u>Institution</u> | <u>Catalog #</u> | <u>Species</u> | <u>County</u> | <u>Year Collected</u> | <u>Reps Positive</u> |
|--------------------|------------------|----------------|---------------|-----------------------|----------------------|
| CAS                | 10114            | ANBO           | Ventura       | 1949                  | 0                    |
| CAS                | 10115            | ANBO           | Ventura       | 1949                  | 0                    |
| CAS                | 10116            | ANBO           | Ventura       | 1949                  | 0                    |
| CAS                | 10117            | ANBO           | Ventura       | 1949                  | 0                    |
| CAS                | 10119            | ANBO           | Ventura       | 1949                  | 0                    |
| CAS                | 10120            | ANBO           | Ventura       | 1949                  | 0                    |
| CAS                | 10121            | ANBO           | Ventura       | 1949                  | 0                    |
| CAS                | 10122            | ANBO           | Ventura       | 1949                  | 0                    |
| CAS                | 10123            | ANBO           | Ventura       | 1949                  | 0                    |
| CAS                | 10129            | ANCA           | Ventura       | 1949                  | 0                    |
| CAS                | 10130            | ANCA           | Ventura       | 1949                  | 0                    |
| CAS                | 10131            | ANCA           | Ventura       | 1949                  | 0                    |
| CAS                | 10132            | ANCA           | Ventura       | 1949                  | 0                    |
| CAS                | 10133            | ANCA           | Ventura       | 1949                  | 0                    |
| CAS                | 10134            | ANCA           | Ventura       | 1949                  | 0                    |
| CAS                | 10135            | ANCA           | Ventura       | 1949                  | 0                    |
| CAS                | 10136            | ANCA           | Ventura       | 1949                  | 0                    |
| CAS                | 10137            | ANCA           | Ventura       | 1949                  | 0                    |
| CAS                | 10138            | ANCA           | Ventura       | 1949                  | 0                    |
| CAS                | 10139            | ANCA           | Ventura       | 1949                  | 0                    |
| CAS                | 10140            | ANCA           | Ventura       | 1949                  | 0                    |
| CAS                | 10141            | ANCA           | Ventura       | 1949                  | 0                    |
| CAS                | 10142            | ANCA           | Ventura       | 1949                  | 1                    |
| CAS                | 10143            | ANCA           | Ventura       | 1949                  | 0                    |
| CAS                | 10144            | ANCA           | Ventura       | 1949                  | 0                    |
| CAS                | 10145            | ANCA           | Ventura       | 1949                  | 0                    |
| CAS                | 10146            | ANCA           | Ventura       | 1949                  | 0                    |
| CAS                | 10148            | ANCA           | Ventura       | 1949                  | 0                    |
| CAS                | 10149            | ANCA           | Ventura       | 1949                  | 0                    |
| CAS                | 10150            | ANCA           | Ventura       | 1949                  | 1                    |
| CAS                | 10152            | ANCA           | Ventura       | 1949                  | 0                    |
| CAS                | 10200            | HYRE           | Ventura       | 1949                  | 0                    |
| CAS                | 10201            | HYRE           | Ventura       | 1949                  | 0                    |
| CAS                | 10212            | RADR           | Ventura       | 1949                  | 0                    |
| CAS                | 10213            | RADR           | Ventura       | 1949                  | 0                    |
| CAS                | 10214            | RADR           | Ventura       | 1949                  | 0                    |
| CAS                | 10215            | RADR           | Ventura       | 1949                  | 0                    |
| CAS                | 10216            | RADR           | Ventura       | 1949                  | 0                    |
| CAS                | 10217            | RADR           | Ventura       | 1949                  | 0                    |
| CAS                | 10218            | RADR           | Ventura       | 1949                  | 0                    |
| CAS                | 10219            | RADR           | Ventura       | 1949                  | 0                    |

Appendix 2. Museum specimen data used for analysis. Reps positive = number of qPCR replicates (out of 3) in which Bd was detected. Species codes are available in Figure 3 of the main text.

| <u>Institution</u> | <u>Catalog #</u> | <u>Species</u> | <u>County</u> | <u>Year Collected</u> | <u>Reps Positive</u> |
|--------------------|------------------|----------------|---------------|-----------------------|----------------------|
| CAS                | 10220            | RADR           | Ventura       | 1949                  | 0                    |
| CAS                | 10633            | HYRE           | Los Angeles   | 1951                  | 0                    |
| CAS                | 199438           | RABO           | Los Angeles   | 1969                  | 0                    |
| CAS                | 199439           | RABO           | Los Angeles   | 1969                  | 0                    |
| CAS                | 17655            | TATO           | Los Angeles   | 1956                  | 0                    |
| CAS                | 17656            | TATO           | Los Angeles   | 1956                  | 0                    |
| CAS                | 17657            | TATO           | Los Angeles   | 1956                  | 0                    |
| CAS                | 17658            | TATO           | Los Angeles   | 1956                  | 0                    |
| CAS                | 17659            | TATO           | Los Angeles   | 1956                  | 0                    |
| CAS                | 17660            | TATO           | Los Angeles   | 1956                  | 0                    |
| CAS                | 17661            | TATO           | Los Angeles   | 1956                  | 0                    |
| CAS                | 27421            | TATO           | Los Angeles   | 1911                  | 0                    |
| CAS                | 27422            | TATO           | Los Angeles   | 1911                  | 0                    |
| CAS                | 27423            | TATO           | Los Angeles   | 1911                  | 0                    |
| CAS                | 27424            | TATO           | Los Angeles   | 1911                  | 0                    |
| CAS                | 27425            | TATO           | Los Angeles   | 1911                  | 0                    |
| CAS                | 27426            | TATO           | Los Angeles   | 1911                  | 0                    |
| CAS                | 27427            | TATO           | Los Angeles   | 1911                  | 0                    |
| CAS                | 27428            | TATO           | Los Angeles   | 1911                  | 0                    |
| CAS                | 27429            | TATO           | Los Angeles   | 1911                  | 0                    |
| CAS                | 27430            | TATO           | Los Angeles   | 1911                  | 0                    |
| CAS                | 27431            | TATO           | Los Angeles   | 1911                  | 0                    |
| CAS                | 27432            | TATO           | Los Angeles   | 1911                  | 0                    |
| CAS                | 39988            | TATO           | Los Angeles   | 1915                  | 0                    |
| CAS                | 27374            | ANBO           | Los Angeles   | 1911                  | 0                    |
| CAS                | 27375            | ANBO           | Los Angeles   | 1911                  | 0                    |
| CAS                | 27410            | RADR           | Los Angeles   | 1911                  | 0                    |
| CAS                | 27419            | HYCA           | Los Angeles   | 1911                  | 0                    |
| CAS                | 39989            | TATO           | Los Angeles   | 1915                  | 0                    |
| CAS                | 197451           | TATO           | Los Angeles   | 1993                  | 3                    |
| CAS                | 197452           | TATO           | Los Angeles   | 1993                  | 3                    |
| CAS                | 197453           | TATO           | Los Angeles   | 1993                  | 0                    |
| CAS                | 197454           | TATO           | Los Angeles   | 1993                  | 0                    |
| CAS                | 39177            | RADR           | Santa Barbara | 1914                  | 0                    |
| CAS                | 39865            | ANBO           | Los Angeles   | 1915                  | 2                    |
| CAS                | 39866            | ANBO           | Los Angeles   | 1915                  | 0                    |
| CAS                | 39867            | ANBO           | Los Angeles   | 1915                  | 3                    |
| CAS                | 48999            | RADR           | Los Angeles   | 1919                  | 0                    |
| CAS                | 49000            | RADR           | Los Angeles   | 1919                  | 0                    |
| CAS                | 49033            | HYCA           | Los Angeles   | 1918                  | 0                    |
| CAS                | 49034            | HYCA           | Los Angeles   | 1918                  | 0                    |

Appendix 2. Museum specimen data used for analysis. Reps positive = number of qPCR replicates (out of 3) in which Bd was detected. Species codes are available in Figure 3 of the main text.

| <u>Institution</u> | <u>Catalog #</u> | <u>Species</u> | <u>County</u> | <u>Year Collected</u> | <u>Reps Positive</u> |
|--------------------|------------------|----------------|---------------|-----------------------|----------------------|
| CAS                | 49035            | HYCA           | Los Angeles   | 1918                  | 0                    |
| CAS                | 49036            | HYCA           | Los Angeles   | 1918                  | 0                    |
| CAS                | 49037            | HYCA           | Los Angeles   | 1918                  | 0                    |
| CAS                | 49038            | HYCA           | Los Angeles   | 1918                  | 0                    |
| CAS                | 49039            | HYCA           | Los Angeles   | 1918                  | 0                    |
| CAS                | 49040            | HYCA           | Los Angeles   | 1918                  | 0                    |
| CAS                | 49041            | HYCA           | Los Angeles   | 1916                  | 0                    |
| CAS                | 49042            | HYCA           | Los Angeles   | 1916                  | 0                    |
| CAS                | 49044            | HYCA           | Los Angeles   | 1916                  | 0                    |
| CAS                | 49045            | HYCA           | Los Angeles   | 1916                  | 0                    |
| CAS                | 49046            | HYCA           | Los Angeles   | 1916                  | 0                    |
| CAS                | 49047            | HYCA           | Los Angeles   | 1916                  | 0                    |
| CAS                | 49048            | HYCA           | Los Angeles   | 1916                  | 0                    |
| CAS                | 49049            | HYCA           | Los Angeles   | 1916                  | 0                    |
| CAS                | 50309            | HYCA           | Ventura       | 1921                  | 0                    |
| CAS                | 50310            | HYCA           | Ventura       | 1921                  | 0                    |
| CAS                | 50311            | HYCA           | Ventura       | 1921                  | 0                    |
| CAS                | 50312            | HYCA           | Ventura       | 1921                  | 0                    |
| CAS                | 50313            | HYCA           | Ventura       | 1921                  | 0                    |
| CAS                | 50314            | HYCA           | Ventura       | 1921                  | 0                    |
| CAS                | 50315            | HYCA           | Ventura       | 1921                  | 0                    |
| CAS                | 50316            | ANBO           | Ventura       | 1921                  | 0                    |
| CAS                | 50365            | ANBO           | Ventura       | 1921                  | 0                    |
| CAS                | 50392            | HYCA           | Ventura       | 1921                  | 0                    |
| CAS                | 50397            | HYCA           | Ventura       | 1921                  | 0                    |
| CAS                | 50401            | HYCA           | Ventura       | 1921                  | 0                    |
| CAS                | 50403            | HYCA           | Ventura       | 1921                  | 0                    |
| CAS                | 50404            | HYCA           | Ventura       | 1921                  | 0                    |
| CAS                | 50420            | HYCA           | Ventura       | 1921                  | 0                    |
| CAS                | 50424            | HYCA           | Ventura       | 1921                  | 0                    |
| CAS                | 50430            | HYCA           | Ventura       | 1921                  | 0                    |
| CAS                | 50435            | HYCA           | Ventura       | 1921                  | 0                    |
| CAS                | 50437            | HYCA           | Ventura       | 1921                  | 0                    |
| CAS                | 50443            | HYCA           | Ventura       | 1921                  | 0                    |
| CAS                | 50445            | HYCA           | Ventura       | 1921                  | 0                    |
| CAS                | 50449            | HYCA           | Ventura       | 1921                  | 0                    |
| CAS                | 50459            | HYCA           | Ventura       | 1921                  | 0                    |
| CAS                | 50460            | HYCA           | Ventura       | 1921                  | 0                    |
| CAS                | 63048            | HYCA           | Ventura       | 1927                  | 0                    |
| CAS                | 63049            | HYCA           | Ventura       | 1927                  | 2                    |
| CAS                | 63050            | HYCA           | Ventura       | 1927                  | 0                    |

Appendix 2. Museum specimen data used for analysis. Reps positive = number of qPCR replicates (out of 3) in which Bd was detected. Species codes are available in Figure 3 of the main text.

| <u>Institution</u> | <u>Catalog #</u> | <u>Species</u> | <u>County</u> | <u>Year Collected</u> | <u>Reps Positive</u> |
|--------------------|------------------|----------------|---------------|-----------------------|----------------------|
| CAS                | 63051            | HYCA           | Ventura       | 1927                  | 0                    |
| CAS                | 63052            | HYCA           | Ventura       | 1927                  | 0                    |
| CAS                | 175693           | ANBO           | Los Angeles   | 1975                  | 0                    |
| CAS                | 175694           | ANBO           | Los Angeles   | 1975                  | 0                    |
| CAS                | 176387           | ANBO           | Ventura       | 1990                  | 0                    |
| CAS                | 178491           | RADR           | Santa Barbara | 1979                  | 0                    |
| CAS                | 180836           | TATO           | Santa Barbara | 1960                  | 0                    |
| CAS                | 180837           | TATO           | Santa Barbara | 1960                  | 0                    |
| CAS                | 181039           | ANBO           | Santa Barbara | 1960                  | 0                    |
| CAS                | 181040           | ANBO           | Santa Barbara | 1960                  | 0                    |
| CAS                | 181041           | ANBO           | Santa Barbara | 1960                  | 0                    |
| CAS                | 181042           | ANBO           | Santa Barbara | 1960                  | 0                    |
| CAS                | 181043           | ANBO           | Santa Barbara | 1961                  | 0                    |
| CAS                | 181044           | ANBO           | Santa Barbara | 1961                  | 0                    |
| CAS                | 181045           | ANBO           | Santa Barbara | 1961                  | 0                    |
| CAS                | 181046           | ANBO           | Santa Barbara | 1961                  | 0                    |
| CAS                | 181047           | ANBO           | Santa Barbara | 1961                  | 0                    |
| CAS                | 181048           | ANBO           | Santa Barbara | 1961                  | 0                    |
| CAS                | 181049           | ANBO           | Santa Barbara | 1961                  | 0                    |
| CAS                | 181053           | ANBO           | Santa Barbara | 1961                  | 0                    |
| CAS                | 181054           | ANBO           | Santa Barbara | 1961                  | 0                    |
| CAS                | 181055           | ANBO           | Santa Barbara | 1961                  | 0                    |
| CAS                | 181057           | ANBO           | Santa Barbara | 1961                  | 0                    |
| CAS                | 181058           | ANBO           | Santa Barbara | 1961                  | 0                    |
| CAS                | 181059           | ANBO           | Santa Barbara | 1961                  | 0                    |
| CAS                | 181060           | ANBO           | Santa Barbara | 1961                  | 0                    |
| CAS                | 181061           | ANBO           | Santa Barbara | 1961                  | 0                    |
| CAS                | 181062           | ANBO           | Santa Barbara | 1961                  | 0                    |
| CAS                | 181064           | ANBO           | Santa Barbara | 1961                  | 0                    |
| CAS                | 181065           | ANBO           | Santa Barbara | 1961                  | 0                    |
| CAS                | 181066           | ANBO           | Santa Barbara | 1961                  | 0                    |
| CAS                | 181067           | ANBO           | Santa Barbara | 1961                  | 2                    |
| CAS                | 181068           | ANBO           | Santa Barbara | 1961                  | 0                    |
| CAS                | 181069           | ANBO           | Santa Barbara | 1961                  | 0                    |
| CAS                | 181071           | ANBO           | Santa Barbara | 1961                  | 0                    |
| CAS                | 181072           | ANBO           | Santa Barbara | 1961                  | 0                    |
| CAS                | 181073           | ANBO           | Santa Barbara | 1961                  | 0                    |
| CAS                | 181074           | ANBO           | Santa Barbara | 1961                  | 0                    |
| CAS                | 181075           | ANBO           | Santa Barbara | 1961                  | 0                    |
| CAS                | 181076           | ANBO           | Santa Barbara | 1963                  | 0                    |
| CAS                | 181077           | ANBO           | Santa Barbara | 1966                  | 0                    |

Appendix 2. Museum specimen data used for analysis. Reps positive = number of qPCR replicates (out of 3) in which Bd was detected. Species codes are available in Figure 3 of the main text.

| <u>Institution</u> | <u>Catalog #</u> | <u>Species</u> | <u>County</u> | <u>Year Collected</u> | <u>Reps Positive</u> |
|--------------------|------------------|----------------|---------------|-----------------------|----------------------|
| CAS                | 181078           | ANBO           | Santa Barbara | 1966                  | 0                    |
| CAS                | 181079           | ANBO           | Santa Barbara | 1966                  | 0                    |
| CAS                | 181080           | ANBO           | Santa Barbara | 1966                  | 0                    |
| CAS                | 181081           | ANBO           | Santa Barbara | 1966                  | 0                    |
| CAS                | 181082           | ANBO           | Santa Barbara | 1966                  | 0                    |
| CAS                | 181083           | ANBO           | Santa Barbara | 1966                  | 0                    |
| CAS                | 181084           | ANBO           | Santa Barbara | 1966                  | 0                    |
| CAS                | 181085           | ANBO           | Santa Barbara | 1966                  | 0                    |
| CAS                | 181086           | ANBO           | Santa Barbara | 1966                  | 0                    |
| CAS                | 181087           | ANBO           | Ventura       | 1958                  | 0                    |
| CAS                | 181090           | ANBO           | Ventura       | 1960                  | 0                    |
| CAS                | 181110           | ANBO           | Santa Barbara | 1961                  | 0                    |
| CAS                | 181111           | ANBO           | Santa Barbara | 1961                  | 0                    |
| CAS                | 181130           | HYCA           | Santa Barbara | 1960                  | 0                    |
| CAS                | 181131           | HYCA           | Santa Barbara | 1960                  | 0                    |
| CAS                | 181133           | HYCA           | Santa Barbara | 1960                  | 0                    |
| CAS                | 181134           | HYCA           | Santa Barbara | 1960                  | 0                    |
| CAS                | 181136           | HYCA           | Santa Barbara | 1960                  | 0                    |
| CAS                | 181137           | HYCA           | Santa Barbara | 1960                  | 0                    |
| CAS                | 181138           | HYCA           | Santa Barbara | 1960                  | 0                    |
| CAS                | 181139           | HYCA           | Santa Barbara | 1960                  | 0                    |
| CAS                | 181141           | HYCA           | Santa Barbara | 1960                  | 0                    |
| CAS                | 181142           | HYCA           | Santa Barbara | 1960                  | 0                    |
| CAS                | 181143           | HYCA           | Santa Barbara | 1960                  | 0                    |
| CAS                | 181145           | HYCA           | Santa Barbara | 1960                  | 0                    |
| CAS                | 181146           | HYCA           | Santa Barbara | 1960                  | 0                    |
| CAS                | 181147           | HYCA           | Santa Barbara | 1960                  | 0                    |
| CAS                | 181148           | HYCA           | Santa Barbara | 1960                  | 0                    |
| CAS                | 181153           | HYCA           | Santa Barbara | 1966                  | 0                    |
| CAS                | 181154           | HYCA           | Santa Barbara | 1966                  | 0                    |
| CAS                | 181155           | HYCA           | Santa Barbara | 1966                  | 0                    |
| CAS                | 181156           | HYCA           | Santa Barbara | 1966                  | 0                    |
| CAS                | 181157           | HYCA           | Santa Barbara | 1966                  | 0                    |
| CAS                | 181158           | HYCA           | Santa Barbara | 1966                  | 0                    |
| CAS                | 181159           | HYCA           | Santa Barbara | 1966                  | 1                    |
| CAS                | 181160           | HYCA           | Santa Barbara | 1966                  | 0                    |
| CAS                | 181161           | HYCA           | Santa Barbara | 1966                  | 0                    |
| CAS                | 181162           | HYCA           | Santa Barbara | 1966                  | 0                    |
| CAS                | 181163           | HYCA           | Santa Barbara | 1966                  | 0                    |
| CAS                | 181164           | HYCA           | Santa Barbara | 1966                  | 0                    |
| CAS                | 181165           | HYCA           | Ventura       | 1961                  | 0                    |

Appendix 2. Museum specimen data used for analysis. Reps positive = number of qPCR replicates (out of 3) in which Bd was detected. Species codes are available in Figure 3 of the main text.

| <u>Institution</u> | <u>Catalog #</u> | <u>Species</u> | <u>County</u> | <u>Year Collected</u> | <u>Reps Positive</u> |
|--------------------|------------------|----------------|---------------|-----------------------|----------------------|
| CAS                | 181166           | HYCA           | Ventura       | 1961                  | 0                    |
| CAS                | 181170           | HYRE           | Santa Barbara | 1959                  | 0                    |
| CAS                | 181171           | HYRE           | Santa Barbara | 1959                  | 0                    |
| CAS                | 181172           | HYRE           | Santa Barbara | 1959                  | 0                    |
| CAS                | 181173           | HYRE           | Santa Barbara | 1959                  | 0                    |
| CAS                | 181174           | HYRE           | Santa Barbara | 1960                  | 0                    |
| CAS                | 181175           | HYRE           | Santa Barbara | 1960                  | 0                    |
| CAS                | 181176           | HYRE           | Santa Barbara | 1960                  | 0                    |
| CAS                | 181177           | HYRE           | Santa Barbara | 1960                  | 0                    |
| CAS                | 181193           | HYRE           | Santa Barbara | 1960                  | 0                    |
| CAS                | 181195           | HYRE           | Santa Barbara | 1960                  | 0                    |
| CAS                | 181197           | HYRE           | Santa Barbara | 1961                  | 0                    |
| CAS                | 181198           | HYRE           | Santa Barbara | 1961                  | 0                    |
| CAS                | 181199           | HYRE           | Santa Barbara | 1961                  | 0                    |
| CAS                | 181200           | HYRE           | Santa Barbara | 1961                  | 0                    |
| CAS                | 181201           | HYRE           | Santa Barbara | 1961                  | 0                    |
| CAS                | 181205           | HYRE           | Santa Barbara | 1961                  | 0                    |
| CAS                | 181206           | HYRE           | Santa Barbara | 1961                  | 0                    |
| CAS                | 181207           | HYRE           | Santa Barbara | 1961                  | 0                    |
| CAS                | 181208           | HYRE           | Santa Barbara | 1961                  | 0                    |
| CAS                | 181209           | HYRE           | Santa Barbara | 1961                  | 0                    |
| CAS                | 181210           | HYRE           | Santa Barbara | 1961                  | 0                    |
| CAS                | 181213           | HYRE           | Santa Barbara | 1961                  | 0                    |
| CAS                | 181214           | HYRE           | Santa Barbara | 1961                  | 0                    |
| CAS                | 181215           | HYRE           | Santa Barbara | 1964                  | 0                    |
| CAS                | 181216           | HYRE           | Santa Barbara | 1964                  | 0                    |
| CAS                | 181217           | HYRE           | Santa Barbara | 1964                  | 0                    |
| CAS                | 181218           | HYRE           | Santa Barbara | 1964                  | 0                    |
| CAS                | 181219           | HYRE           | Santa Barbara | 1959                  | 0                    |
| CAS                | 181220           | HYRE           | Santa Barbara | 1959                  | 0                    |
| CAS                | 181221           | HYRE           | Santa Barbara | 1959                  | 0                    |
| CAS                | 181222           | HYRE           | Santa Barbara | 1959                  | 0                    |
| CAS                | 181223           | RADR           | Santa Barbara | 1963                  | 0                    |
| CAS                | 181224           | RADR           | Santa Barbara | 1963                  | 1                    |
| CAS                | 181225           | RADR           | Santa Barbara | 1963                  | 0                    |
| CAS                | 181226           | RADR           | Santa Barbara | 1963                  | 0                    |
| CAS                | 181227           | RADR           | Santa Barbara | 1963                  | 0                    |
| CAS                | 181228           | RADR           | Santa Barbara | 1960                  | 0                    |
| CAS                | 181229           | RADR           | Santa Barbara | 1960                  | 0                    |
| CAS                | 181230           | RADR           | Santa Barbara | 1960                  | 0                    |
| CAS                | 181231           | RADR           | Santa Barbara | 1960                  | 0                    |



Appendix 2. Museum specimen data used for analysis. Reps positive = number of qPCR replicates (out of 3) in which Bd was detected. Species codes are available in Figure 3 of the main text.

| <u>Institution</u> | <u>Catalog #</u> | <u>Species</u> | <u>County</u>   | <u>Year Collected</u> | <u>Reps Positive</u> |
|--------------------|------------------|----------------|-----------------|-----------------------|----------------------|
| CAS                | 181232           | RADR           | Santa Barbara   | 1960                  | 0                    |
| CAS                | 181233           | RADR           | Santa Barbara   | 1960                  | 0                    |
| CAS                | 181234           | RADR           | Santa Barbara   | 1960                  | 0                    |
| CAS                | 181235           | RADR           | Santa Barbara   | 1960                  | 0                    |
| CAS                | 181236           | RADR           | Santa Barbara   | 1960                  | 0                    |
| CAS                | 181237           | RADR           | Santa Barbara   | 1960                  | 0                    |
| CAS                | 181238           | RADR           | Santa Barbara   | 1960                  | 0                    |
| CAS                | 181239           | RADR           | Santa Barbara   | 1960                  | 0                    |
| CAS                | 181240           | RADR           | Santa Barbara   | 1960                  | 0                    |
| CAS                | 181241           | RADR           | Santa Barbara   | 1960                  | 0                    |
| CAS                | 181242           | RADR           | Santa Barbara   | 1960                  | 0                    |
| CAS                | 181243           | RADR           | Santa Barbara   | 1960                  | 0                    |
| CAS                | 181250           | RADR           | Santa Barbara   | 1961                  | 0                    |
| CAS                | 181251           | RADR           | Santa Barbara   | 1961                  | 0                    |
| CAS                | 181252           | RADR           | Santa Barbara   | 1961                  | 0                    |
| CAS                | 181253           | RADR           | Santa Barbara   | 1961                  | 0                    |
| CAS                | 181254           | RADR           | Santa Barbara   | 1961                  | 0                    |
| CAS                | 181255           | RADR           | Santa Barbara   | 1961                  | 0                    |
| CAS                | 181256           | RADR           | Santa Barbara   | 1961                  | 0                    |
| CAS                | 181257           | RADR           | Santa Barbara   | 1961                  | 0                    |
| CAS                | 181261           | RADR           | Santa Barbara   | 1962                  | 0                    |
| CAS                | 181265           | RADR           | Santa Barbara   | 1966                  | 0                    |
| CAS                | 181266           | RADR           | Santa Barbara   | 1966                  | 0                    |
| CAS                | 181269           | RABO           | Santa Barbara   | 1960                  | 0                    |
| CAS                | 181270           | RABO           | Santa Barbara   | 1960                  | 0                    |
| CAS                | 181271           | RABO           | Santa Barbara   | 1960                  | 0                    |
| CAS                | 187904           | HYRE           | San Luis Obispo | 1988                  | 0                    |
| CAS                | 188085           | HYCA           | Santa Barbara   | 1988                  | 0                    |
| CAS                | 188086           | HYCA           | Santa Barbara   | 1988                  | 0                    |
| CAS                | 188087           | HYCA           | Santa Barbara   | 1988                  | 0                    |
| CAS                | 188088           | HYCA           | Santa Barbara   | 1988                  | 0                    |
| CAS                | 190943           | ANCA           | Santa Barbara   | 1966                  | 0                    |
| CAS                | 190944           | ANCA           | Santa Barbara   | 1966                  | 2                    |
| CAS                | 190945           | ANCA           | Santa Barbara   | 1966                  | 0                    |
| CAS                | 190946           | ANCA           | Santa Barbara   | 1966                  | 0                    |
| CAS                | 190947           | ANCA           | Santa Barbara   | 1966                  | 1                    |
| CAS                | 190948           | ANCA           | Santa Barbara   | 1966                  | 0                    |
| CAS                | 190949           | ANCA           | Santa Barbara   | 1966                  | 0                    |
| CAS                | 190950           | ANCA           | Santa Barbara   | 1966                  | 0                    |
| CAS                | 190951           | ANCA           | Santa Barbara   | 1962                  | 0                    |
| CAS                | 197401           | HYCA           | Los Angeles     | 1993                  | 3                    |

Appendix 2. Museum specimen data used for analysis. Reps positive = number of qPCR replicates (out of 3) in which Bd was detected. Species codes are available in Figure 3 of the main text.

| <u>Institution</u> | <u>Catalog #</u> | <u>Species</u> | <u>County</u>   | <u>Year Collected</u> | <u>Reps Positive</u> |
|--------------------|------------------|----------------|-----------------|-----------------------|----------------------|
| CAS                | 197402           | HYCA           | Los Angeles     | 1993                  | 3                    |
| CAS                | 197403           | HYRE           | Los Angeles     | 1993                  | 0                    |
| CAS                | 197404           | HYCA           | Los Angeles     | 1993                  | 3                    |
| CAS                | 197405           | HYCA           | Los Angeles     | 1993                  | 0                    |
| CAS                | 197406           | HYCA           | Los Angeles     | 1993                  | 3                    |
| CAS                | 197407           | HYCA           | Los Angeles     | 1993                  | 0                    |
| CAS                | 197409           | HYCA           | Los Angeles     | 1993                  | 0                    |
| CAS                | 197410           | HYCA           | Los Angeles     | 1993                  | 1                    |
| CAS                | 197411           | HYCA           | Los Angeles     | 1993                  | 3                    |
| CAS                | 197412           | HYCA           | Los Angeles     | 1993                  | 0                    |
| CAS                | 197415           | HYCA           | Los Angeles     | 1994                  | 0                    |
| CAS                | 197416           | HYCA           | Los Angeles     | 1994                  | 3                    |
| CAS                | 197444           | ANBO           | Los Angeles     | 1993                  | 0                    |
| CAS                | 197445           | ANBO           | Los Angeles     | 1993                  | 3                    |
| CAS                | 180838           | TATO           | Santa Barbara   | 1960                  | 0                    |
| CAS                | 180839           | TATO           | Santa Barbara   | 1960                  | 0                    |
| CAS                | 180840           | TATO           | Santa Barbara   | 1960                  | 0                    |
| CAS                | 180841           | TATO           | Santa Barbara   | 1960                  | 0                    |
| CAS                | 197584           | RADR           | San Luis Obispo | 1994                  | 3                    |
| CAS                | 199428           | ANBO           | Los Angeles     | 1969                  | 0                    |
| CAS                | 199429           | ANBO           | Los Angeles     | 1969                  | 0                    |
| CAS                | 199430           | ANBO           | Los Angeles     | 1969                  | 0                    |
| CAS                | 199431           | ANBO           | Los Angeles     | 1969                  | 0                    |
| CAS                | 199432           | ANBO           | Los Angeles     | 1969                  | 0                    |
| CAS                | 181272           | RABO           | Santa Barbara   | 1960                  | 0                    |
| CAS                | 181273           | RABO           | Santa Barbara   | 1960                  | 0                    |
| CAS                | 199458           | HYRE           | Los Angeles     | 1969                  | 0                    |
| CAS                | 199459           | HYRE           | Los Angeles     | 1969                  | 0                    |
| CAS                | 199460           | HYRE           | Los Angeles     | 1969                  | 0                    |
| CAS                | 199461           | HYRE           | Los Angeles     | 1969                  | 1                    |
| CAS                | 199462           | HYCA           | Los Angeles     | 1969                  | 0                    |
| CAS                | 199463           | HYCA           | Los Angeles     | 1969                  | 0                    |
| CAS                | 206482           | HYCA           | Ventura         | 1998                  | 0                    |
| CAS                | 207434           | ANBO           | Los Angeles     | 1998                  | 0                    |
| CAS                | 208506           | ANBO           | San Luis Obispo | 1999                  | 3                    |
| CAS                | 208507           | ANBO           | San Luis Obispo | 1999                  | 3                    |
| CAS                | 208510           | HYRE           | San Luis Obispo | 1999                  | 3                    |
| CAS                | 208511           | HYRE           | San Luis Obispo | 1999                  | 3                    |
| CAS                | 210394           | RADR           | San Luis Obispo | 1998                  | 3                    |
| CAS                | 210395           | RADR           | San Luis Obispo | 1998                  | 3                    |
| CAS                | 218286           | RADR           | Santa Barbara   | 1931                  | 0                    |

Appendix 2. Museum specimen data used for analysis. Reps positive = number of qPCR replicates (out of 3) in which Bd was detected. Species codes are available in Figure 3 of the main text.

| <u>Institution</u> | <u>Catalog #</u> | <u>Species</u> | <u>County</u>   | <u>Year Collected</u> | <u>Reps Positive</u> |
|--------------------|------------------|----------------|-----------------|-----------------------|----------------------|
| CAS                | 233771           | RACA           | Los Angeles     | 2000                  | 0                    |
| CAS                | 233772           | RACA           | Los Angeles     | 2000                  | 0                    |
| CAS                | 233773           | RACA           | Los Angeles     | 2000                  | 0                    |
| CAS                | 233774           | RACA           | Los Angeles     | 2000                  | 3                    |
| CAS                | 244987           | HYRE           | Los Angeles     | 2008                  | 3                    |
| CAS                | 244988           | HYRE           | Los Angeles     | 2008                  | 3                    |
| CAS                | 181274           | RABO           | Santa Barbara   | 1960                  | 0                    |
| CAS                | 181275           | RABO           | Santa Barbara   | 1961                  | 0                    |
| CAS                | 10224            | RABO           | Ventura         | 1949                  | 0                    |
| CAS                | 10225            | RABO           | Ventura         | 1949                  | 0                    |
| CAS                | 10226            | RABO           | Ventura         | 1949                  | 0                    |
| CAS                | 10227            | RABO           | Ventura         | 1949                  | 0                    |
| CAS                | 10228            | RABO           | Ventura         | 1949                  | 0                    |
| CAS                | 10229            | RABO           | Ventura         | 1949                  | 0                    |
| CAS                | 39253            | RABO           | Ventura         | 1914                  | 0                    |
| CAPO               |                  | RABO           | San Luis Obispo | 1958                  | 0                    |
| CAPO               |                  | RABO           | San Luis Obispo | 1958                  | 0                    |
| CAPO               |                  | RABO           | San Luis Obispo | 1959                  | 0                    |
| CAPO               |                  | RABO           | San Luis Obispo | 1959                  | 0                    |
| CAPO               |                  | RABO           | San Luis Obispo | 1959                  | 0                    |
| CAPO               |                  | RABO           | San Luis Obispo | 1959                  | 0                    |
| CAPO               |                  | RABO           | San Luis Obispo | 1959                  | 0                    |
| CAPO               |                  | RABO           | San Luis Obispo | 1959                  | 0                    |
| CAPO               |                  | RABO           | San Luis Obispo | 1959                  | 0                    |
| CAPO               |                  | RABO           | San Luis Obispo | 1959                  | 0                    |
| CAPO               |                  | RABO           | San Luis Obispo | 1959                  | 0                    |
| CAPO               |                  | RABO           | San Luis Obispo | 1959                  | 0                    |
| CAPO               |                  | RABO           | San Luis Obispo | 1959                  | 0                    |
| CAPO               |                  | RABO           | San Luis Obispo | 1959                  | 0                    |
| CAPO               |                  | RABO           | San Luis Obispo | 1959                  | 0                    |
| CAPO               |                  | RABO           | San Luis Obispo | 1959                  | 0                    |
| CAPO               |                  | RABO           | San Luis Obispo | 1959                  | 0                    |
| CAPO               |                  | RABO           | San Luis Obispo | 1959                  | 0                    |
| CAPO               |                  | RABO           | San Luis Obispo | 1959                  | 0                    |
| CAPO               |                  | RABO           | San Luis Obispo | 1959                  | 0                    |
| CAPO               |                  | RABO           | San Luis Obispo | 1959                  | 0                    |
| CAPO               |                  | RABO           | San Luis Obispo | 1959                  | 0                    |
| CAPO               |                  | RABO           | San Luis Obispo | 1959                  | 0                    |
| CAPO               |                  | RABO           | San Luis Obispo | 1959                  | 0                    |
| CAPO               |                  | RABO           | San Luis Obispo | 1959                  | 0                    |
| CAPO               |                  | RABO           | San Luis Obispo | 1959                  | 0                    |
| CAPO               |                  | RABO           | San Luis Obispo | 1959                  | 0                    |
| CAPO               |                  | RABO           | San Luis Obispo | 1959                  | 0                    |
| CAPO               |                  | RABO           | San Luis Obispo | 1960                  | 0                    |
| CAPO               |                  | RABO           | San Luis Obispo | 1960                  | 0                    |
| CAPO               |                  | RABO           | San Luis Obispo | 1960                  | 0                    |

Appendix 2. Museum specimen data used for analysis. Reps positive = number of qPCR replicates (out of 3) in which Bd was detected. Species codes are available in Figure 3 of the main text.

| <u>Institution</u> | <u>Catalog #</u> | <u>Species</u> | <u>County</u>   | <u>Year Collected</u> | <u>Reps Positive</u> |
|--------------------|------------------|----------------|-----------------|-----------------------|----------------------|
| CAPO               |                  | RABO           | San Luis Obispo | 1960                  | 0                    |
| CAPO               |                  | RABO           | San Luis Obispo | 1960                  | 0                    |
| CAPO               |                  | RABO           | San Luis Obispo | 1960                  | 0                    |
| CAPO               | H-00040          | RADR           | San Luis Obispo | 1959                  | 0                    |
| CAPO               | H-00045          | HYRE           | San Luis Obispo | 1958                  | 0                    |
| CAPO               | H-00102          | RADR           | San Luis Obispo | 1958                  | 0                    |
| CAPO               | H-00127          | RADR           | San Luis Obispo | 1958                  | 0                    |
| CAPO               | H-00128          | RADR           | San Luis Obispo | 1958                  | 0                    |
| CAPO               | H-00149          | RADR           | San Luis Obispo | 1958                  | 0                    |
| CAPO               | H-00150          | RADR           | San Luis Obispo | 1958                  | 0                    |
| CAPO               | H-00151          | RADR           | San Luis Obispo | 1958                  | 0                    |
| CAPO               | H-00159          | HYRE           | San Luis Obispo | 1958                  | 0                    |
| CAPO               | H-00160          | HYRE           | San Luis Obispo | 1958                  | 0                    |
| CAPO               | H-00164          | HYRE           | San Luis Obispo | 1958                  | 0                    |
| CAPO               | H-00166          | HYRE           | San Luis Obispo | 1958                  | 0                    |
| CAPO               | H-00175          | RADR           | San Luis Obispo | 1958                  | 0                    |
| CAPO               | H-00197          | RADR           | San Luis Obispo | 1958                  | 1                    |
| CAPO               | H-00198          | RADR           | San Luis Obispo | 1958                  | 0                    |
| CAPO               | H-00199          | RADR           | San Luis Obispo | 1958                  | 0                    |
| CAPO               | H-00203          | HYRE           | San Luis Obispo | 1958                  | 0                    |
| CAPO               | H-00205          | HYRE           | San Luis Obispo | 1958                  | 0                    |
| CAPO               | H-00206          | HYRE           | San Luis Obispo | 1958                  | 0                    |
| CAPO               | H-00208          | HYRE           | San Luis Obispo | 1958                  | 0                    |
| CAPO               | H-00209          | HYRE           | San Luis Obispo | 1958                  | 0                    |
| CAPO               | H-00213          | HYRE           | San Luis Obispo | 1958                  | 0                    |
| CAPO               | H-00215          | HYRE           | San Luis Obispo | 1958                  | 0                    |
| CAPO               | H-00260          | RADR           | San Luis Obispo | 1958                  | 0                    |
| CAPO               | H-00262          | RADR           | San Luis Obispo | 1958                  | 0                    |
| CAPO               | H-00264          | RADR           | San Luis Obispo | 1958                  | 0                    |
| CAPO               | H-00265          | RADR           | San Luis Obispo | 1958                  | 0                    |
| CAPO               | H-00279          | HYRE           | San Luis Obispo | 1958                  | 0                    |
| CAPO               | H-00280          | HYRE           | San Luis Obispo | 1958                  | 0                    |
| CAPO               | H-00288          | HYRE           | San Luis Obispo | 1958                  | 0                    |
| CAPO               | H-00294          | RADR           | San Luis Obispo | 1958                  | 0                    |
| CAPO               | H-00295          | RADR           | San Luis Obispo | 1958                  | 0                    |
| CAPO               | H-00296          | RADR           | San Luis Obispo | 1958                  | 0                    |
| CAPO               | H-00297          | RADR           | San Luis Obispo | 1958                  | 0                    |
| CAPO               | H-00299          | RADR           | San Luis Obispo | 1958                  | 0                    |
| CAPO               | H-00300          | RADR           | San Luis Obispo | 1958                  | 0                    |
| CAPO               | H-00302          | RADR           | San Luis Obispo | 1958                  | 0                    |
| CAPO               | H-00303          | RADR           | San Luis Obispo | 1958                  | 0                    |





Appendix 2. Museum specimen data used for analysis. Reps positive = number of qPCR replicates (out of 3) in which Bd was detected. Species codes are available in Figure 3 of the main text.

| <b><u>Institution</u></b> | <b><u>Catalog #</u></b> | <b><u>Species</u></b> | <b><u>County</u></b> | <b><u>Year Collected</u></b> | <b><u>Reps Positive</u></b> |
|---------------------------|-------------------------|-----------------------|----------------------|------------------------------|-----------------------------|
| CAPO                      |                         | HYRE                  | San Luis Obispo      | 1967                         | 0                           |
| CAPO                      |                         | HYRE                  | San Luis Obispo      | 1967                         | 0                           |
| CAPO                      |                         | HYRE                  | San Luis Obispo      | 1967                         | 0                           |
